# Supplementary material for: Density-functional tight-binding for phosphine-stabilized nanoscale gold clusters
Source: PubMed Central journal article supplement (PMC8163209; doi:10.1039/d0sc04514d), 2020-11-02
Supplement: SC-011-D0SC04514D-s005.pdf [file SC-011-D0SC04514D-s005.pdf]

# Electronic Supplementary Information: Density-Functional Tight-Binding for Phosphine-Stabilized Nanoscale Gold Clusters

Van Quan Vuong,<sup>a‡</sup> Jenica Marie L. Madridejos,<sup>b‡</sup> Bálint Aradi,<sup>c</sup> Bobby G. Sumpter,<sup>d,e</sup> Gregory F. Metha,<sup>\*b</sup> and Stephan Irle<sup>\*ae</sup>

## List of Figures

- S1 The DFTB2 auorg<sup>α'</sup> and auorg<sup>χ'</sup> Au-P repulsive potentials. Ideally, the DFTB repulsive potentials are positive, however, in the case if Au-P potential the repulsive potential is negative in the bonding range of ≈2.4 Å. The attractive interaction was made to compensate the under-binding of Au-P electronic interaction, which can be attributed to the effect of the minimum basis set in DFTB method. It is worth mentioning that Au-Au repulsive potential is also attractive ≈16 kcal/mol. . . . . 3
- S2 RMSD over atomic positions for the large-sized phosphine-stabilized gold clusters. The RMSD of atomic positions considers Au, and P atoms for all large-sized phosphine-based gold clusters, [Au<sub>11</sub>(PMePh<sub>2</sub>)<sub>10</sub>]<sub>#</sub><sup>3+</sup> denotes [Au<sub>11</sub>(PMePh<sub>2</sub>)<sub>10</sub>]<sup>3+</sup> (C<sub>3v</sub>), [Au<sub>11</sub>(PMePh<sub>2</sub>)<sub>10</sub>]<sub>\*</sub><sup>3+</sup> denotes [Au<sub>11</sub>(PMePh<sub>2</sub>)<sub>10</sub>]<sup>3+</sup> (D<sub>4d</sub>), [Au<sub>38</sub>(L)<sub>20</sub>(PPh<sub>3</sub>)<sub>4</sub>]<sup>2+</sup> denotes [Au<sub>38</sub>(m-MBT)<sub>20</sub>(PPh<sub>3</sub>)<sub>4</sub>]<sup>2+</sup>. . . . . 6
- S3 Overlap of experimental crystal structure (Au in gold, P in orange and C in grey) and optimized DFTB/auorg<sup>α</sup> and DFTB/auorg<sup>χ'</sup> structures. auorg<sup>α</sup> and auorg<sup>χ'</sup> structures are represented by light red and sky blue, respectively. The gold nanoclusters considered in this figure are (A) [Au<sub>6</sub>(dppp)<sub>4</sub>]<sup>2+</sup> (BOTSOS), (B) [Au<sub>7</sub>(PPh<sub>3</sub>)<sub>7</sub>]<sup>+</sup> (BIXZAK), (C) [Au<sub>8</sub>(PPh<sub>3</sub>)<sub>8</sub>]<sup>2+</sup> (OPAUPF), and (D) [Au<sub>9</sub>(PPh<sub>3</sub>)<sub>8</sub>]<sup>3+</sup> (MIVPOX-D<sub>2h</sub>). . . . . 6
- S4 Deviation in averaged and normalized ligand binding energies for the large-sized phosphine-stabilized gold clusters in reference to the TPSS/def2-SVP binding energies, [Au<sub>11</sub>(PMePh<sub>2</sub>)<sub>10</sub>]<sub>#</sub><sup>3+</sup> denotes [Au<sub>11</sub>(PMePh<sub>2</sub>)<sub>10</sub>]<sup>3+</sup> (C<sub>3v</sub>), [Au<sub>11</sub>(PMePh<sub>2</sub>)<sub>10</sub>]<sub>\*</sub><sup>3+</sup> denotes [Au<sub>11</sub>(PMePh<sub>2</sub>)<sub>10</sub>]<sup>3+</sup> (D<sub>4d</sub>), [Au<sub>38</sub>(L)<sub>20</sub>(PPh<sub>3</sub>)<sub>4</sub>]<sup>2+</sup> denotes [Au<sub>38</sub>(m-MBT)<sub>20</sub>(PPh<sub>3</sub>)<sub>4</sub>]<sup>2+</sup>. . . . . 6
- S5 Overlap of experimental X-ray (Au in gold, P in orange and C in grey) and optimized structures of (A) [Au<sub>9</sub>(PPh<sub>3</sub>)<sub>8</sub>]<sup>3+</sup> D<sub>2h</sub> and C<sub>4</sub> isomers and (B) [Au<sub>11</sub>(PMePh<sub>2</sub>)<sub>10</sub>]<sup>3+</sup> D<sub>4d</sub> and C<sub>3v</sub> isomers. auorg<sup>α'</sup> and DFT structures are represented by light red and sky blue, respectively. The relative energies in kcal/mol with respect to the D<sub>n</sub> isomers are also shown as calculated by TPSS/def-SVP, DFTB2/auorg<sup>α'</sup> and TPSS/def2-SVP//DFTB2/auorg<sup>α'</sup>. Note that the [Au<sub>9</sub>(PPh<sub>3</sub>)<sub>8</sub>]<sup>3+</sup> C<sub>4</sub> isomer does not have an available experimental crystal structure. . . . . 7
- S6 Energy level diagram for the frontier orbitals of various clusters as calculated by (A) DFTB/auorg<sup>α</sup> and (B) DFTB2/auorg<sup>χ'</sup>, [Au<sub>11</sub>(PMePh<sub>2</sub>)<sub>10</sub>]<sub>#</sub><sup>3+</sup> denotes [Au<sub>11</sub>(PMePh<sub>2</sub>)<sub>10</sub>]<sup>3+</sup> (C<sub>3v</sub>), [Au<sub>11</sub>(PMePh<sub>2</sub>)<sub>10</sub>]<sub>\*</sub><sup>3+</sup> denotes [Au<sub>11</sub>(PMePh<sub>2</sub>)<sub>10</sub>]<sup>3+</sup> (D<sub>4d</sub>). Dashed lines are included to guide the eye. . . . . 8
- S7 HOMO and LUMO of (A) [Au<sub>6</sub>(dppp)<sub>4</sub>]<sup>2+</sup>, (B) [Au<sub>7</sub>(PPh<sub>3</sub>)<sub>7</sub>]<sup>+</sup> (BIXZAK), (C) [Au<sub>8</sub>(PPh<sub>3</sub>)<sub>8</sub>]<sup>2+</sup> (OPAUPF) and (D) [Au<sub>9</sub>(PPh<sub>3</sub>)<sub>8</sub>]<sup>3+</sup> (MIVPOX-D<sub>2h</sub>) clusters as calculated by TPSS/def2-SVP and DFTB2/auorg<sup>α'</sup>; isosurface value = 0.02 a.u. . . . . 10
- S8 HOMO and LUMO of (A) [Au<sub>6</sub>(dppp)<sub>4</sub>]<sup>2+</sup> and (B) [Au<sub>8</sub>(PPh<sub>3</sub>)<sub>8</sub>]<sup>2+</sup> (OPAUPF) clusters as calculated by TPSS/def2-SVP, DFTB2/auorg<sup>α'</sup>, DFTB2/auorg<sup>α</sup>, and DFTB2/auorg<sup>χ'</sup>; isosurface value = 0.02 a.u. . . . . 11
- S9 HOMO and LUMO of (A) [Au<sub>7</sub>(PPh<sub>3</sub>)<sub>7</sub>]<sup>+</sup> (BIXZAK) and (B) [Au<sub>9</sub>(PPh<sub>3</sub>)<sub>8</sub>]<sup>3+</sup> (MIVPOX-D<sub>2h</sub>) clusters as calculated by TPSS/def2-SVP, DFTB2/auorg<sup>α'</sup>, DFTB2/auorg<sup>α</sup>, and DFTB2/auorg<sup>χ'</sup>; isosurface value = 0.02 a.u. . . . . 12
- S10 Experimental (in black), computed auorg<sup>α</sup> (in green) DFTB2/auorg<sup>α'</sup> (in red), and auorg<sup>χ'</sup> (in orange) far-IR spectra for (A) [Au<sub>6</sub>(dppp)<sub>4</sub>]<sup>2+</sup>, (B) [Au<sub>8</sub>(PPh<sub>3</sub>)<sub>8</sub>]<sup>2+</sup>, and (C) [Au<sub>9</sub>(PPh<sub>3</sub>)<sub>8</sub>]<sup>3+</sup> clusters. . . . . 12
- S11 Different adsorption binding sites on Au (111) surface, only the Au atoms of the top two layers are shown. 16

<sup>a</sup>Bredesen Center for Interdisciplinary Research and Graduate Education, University of Tennessee, Knoxville, TN, United States

<sup>b</sup>Department of Chemistry, The University of Adelaide, South Australia 5005, Australia; E-mail: greg.metha@adelaide.edu.au

<sup>c</sup>Bremen Center for Computational Materials Science, University of Bremen, Bremen, Germany

<sup>d</sup>Center for Nanophase Materials Sciences, Oak Ridge National Laboratory, Oak Ridge, TN, United States

<sup>e</sup>Computational Sciences and Engineering Division, Oak Ridge National Laboratory, Oak Ridge, TN, United States; E-mail: irles@ornl.gov

‡ These authors contributed equally to this work

|     |                                                                                                                                                                                                                                                                                                                                                                                                                                                                                                                                                                                                                                                                                  |    |
|-----|----------------------------------------------------------------------------------------------------------------------------------------------------------------------------------------------------------------------------------------------------------------------------------------------------------------------------------------------------------------------------------------------------------------------------------------------------------------------------------------------------------------------------------------------------------------------------------------------------------------------------------------------------------------------------------|----|
| S12 | HOMO and LUMO plots of $\text{Au}_{108}\text{S}_{24}$ , $\text{Au}_{108}\text{S}_{24}(\text{PH}_3)_{16}$ , and $\text{Au}_{108}\text{S}_{24}(\text{PPh}_3)_{16}$ clusters as calculated by TPSS/def2-SVP//DFTB2/auorg $^{\alpha'}$ ; isosurface value = $0.015 e^{0.5/a_0^3}$ . . . . .                                                                                                                                                                                                                                                                                                                                                                                          | 16 |
| S13 | DFTB calculated IR spectra of $\text{Au}_4(\text{SCH}_3)_4$ , $\text{Au}_{18}(\text{SCH}_3)_{14}$ , and $[\text{Au}_{25}(\text{SCH}_3)_{18}]^-$ . . . . .                                                                                                                                                                                                                                                                                                                                                                                                                                                                                                                        | 20 |
| S14 | Calculated IR spectra of $\text{Au}_{18}(\text{SCH}_3)_{14}$ , $\text{Au}_{18}(\text{S}-\text{C}_6\text{H}_{11})_{14}$ , $\text{Au}_{18}(\text{SPh})_{14}$ , $\text{Au}_{18}(\text{p-MBA})_{14}$ , $\text{Au}_{18}(\text{SPhNO}_2)_{14}$ , and $\text{Au}_{18}(\text{TBBT})_{14}$ clusters using a FWHM of $5 \text{ cm}^{-1}$ Gaussian broadening. More intense IR spectra are observed on p-MBA- and SPhNO <sub>2</sub> -protected clusters. The additional plots in S-C <sub>6</sub> H <sub>11</sub> -ligated Au <sub>18</sub> are the experimental far-IR spectrum (dotted red) and the DFTB-simulated with a wider FWHM of $8 \text{ cm}^{-1}$ Gaussian broadening. . . . . | 20 |
| S15 | Au <sub>18</sub> S <sub>14</sub> core structures of $\text{Au}_{18}(\text{S}-\text{C}_6\text{H}_{11})_{14}$ , $\text{Au}_{18}(\text{p-MBA})_{14}$ , and $\text{Au}_{18}(\text{SPhNO}_2)_{14}$ clusters with four different ligands (ligand structures are omitted for clarity). Au and S atoms are yellow and orange. The clusters are optimized by means of DFTB/auorg $^{\alpha'}$ with the D3 dispersion corrections. . . . .                                                                                                                                                                                                                                                 | 21 |

## List of Tables

|     |                                                                                                                                                                                                                                                                                                                                                                                                                                                               |    |
|-----|---------------------------------------------------------------------------------------------------------------------------------------------------------------------------------------------------------------------------------------------------------------------------------------------------------------------------------------------------------------------------------------------------------------------------------------------------------------|----|
| S1  | Test results for selected chemical reactions involving H, C, N, O, P, and S containing compounds for DFTB2/mio with various values of the P 3d orbital energy. The DFTB chemical reaction energies are compared to that of wb97X-D3BJ/def2-TZVP method. <sup>2</sup> The chemical reaction energies and deviations are in kcal/mol, P 3d orbital energies are in Hartree. . . . .                                                                             | 4  |
| S2  | Averaged and normalized ligand binding energies in kcal/mol for small-sized clusters. . . . .                                                                                                                                                                                                                                                                                                                                                                 | 5  |
| S3  | Averaged and normalized ligand binding energies in kcal/mol for moderate-sized clusters. . . . .                                                                                                                                                                                                                                                                                                                                                              | 5  |
| S4  | Averaged and normalized ligand binding energies in kcal/mol for large-sized clusters, TPSS denotes TPSS/def2-SVP, $\alpha$ denotes DFTB2/auorg $^{\alpha}$ , TPSS// $\alpha$ denotes TPSS/def2-SVP//DFTB2/auorg $^{\alpha}$ , $\alpha'$ denotes DFTB2/auorg $^{\alpha'}$ , TPSS// $\alpha'$ denotes TPSS/def2-SVP//DFTB2/auorg $^{\alpha'}$ , $\chi'$ denotes DFTB2/auorg $^{\chi'}$ , TPSS// $\chi'$ denotes TPSS/def2-SVP//DFTB2/auorg $^{\chi'}$ . . . . . | 5  |
| S5  | Comparison of relative energies with respect to the D <sub>n</sub> isomers in kcal/mol as calculated by the following methods for $[\text{Au}_9(\text{PPh}_3)_8]^{3+}$ and $[\text{Au}_{11}(\text{PMePh}_2)_{10}]^{3+}$ . . . . .                                                                                                                                                                                                                             | 7  |
| S6  | Comparison of HOMO and LUMO in eV as calculated by DFTB/auorg $^{\alpha'}$ , DFTB/auorg $^{\alpha}$ , DFTB/auorg $^{\chi'}$ , and DFT for small gold clusters. . . . .                                                                                                                                                                                                                                                                                        | 9  |
| S7  | Summary of contributing transitions as calculated by PBE/def2-SVP, DFTB2/auorg $^{\alpha'}$ , DFTB2/auorg $^{\alpha}$ and DFTB2/auorg $^{\chi'}$ for the $[\text{Au}_6(\text{dppp})_4]^{2+}$ cluster and their assignment to the experimental spectral peaks, as well as a brief description of the assigned transition modes . . . . .                                                                                                                       | 13 |
| S8  | Summary of contributing transitions as calculated by PBE/def2-SVP, DFTB2/auorg $^{\alpha'}$ , DFTB2/auorg $^{\alpha}$ and DFTB2/auorg $^{\chi'}$ for the $[\text{Au}_8(\text{PPh}_3)_8]^{2+}$ cluster and their assignment to the experimental spectral peaks, as well as a brief description of the assigned transition modes . . . . .                                                                                                                      | 14 |
| S9  | Summary of contributing transitions as calculated by PBE/def2-SVP, DFTB2/auorg $^{\alpha'}$ , DFTB2/auorg $^{\alpha}$ and DFTB2/auorg $^{\chi'}$ for the $[\text{Au}_9(\text{PPh}_3)_8]^{3+}$ cluster and their assignment to the experimental spectral peaks, as well as a brief description of the assigned transition modes . . . . .                                                                                                                      | 15 |
| S10 | Summary of contributing transitions determined by DFTB2/auorg $^{\alpha'}$ for the $[\text{Au}_{108}\text{S}_{24}(\text{PPh}_3)_{16}]$ cluster and brief description of the assigned transition modes, part 1. . . . .                                                                                                                                                                                                                                        | 17 |
| S11 | Summary of contributing transitions determined by DFTB2/auorg $^{\alpha'}$ for the $[\text{Au}_{108}\text{S}_{24}(\text{PPh}_3)_{16}]$ cluster and brief description of the assigned transition modes, part 2. . . . .                                                                                                                                                                                                                                        | 18 |
| S12 | Summary of contributing transitions determined by DFTB2/auorg $^{\alpha'}$ for the $[\text{Au}_{108}\text{S}_{24}(\text{PPh}_3)_{16}]$ cluster and brief description of the assigned transition modes, part 3. . . . .                                                                                                                                                                                                                                        | 19 |

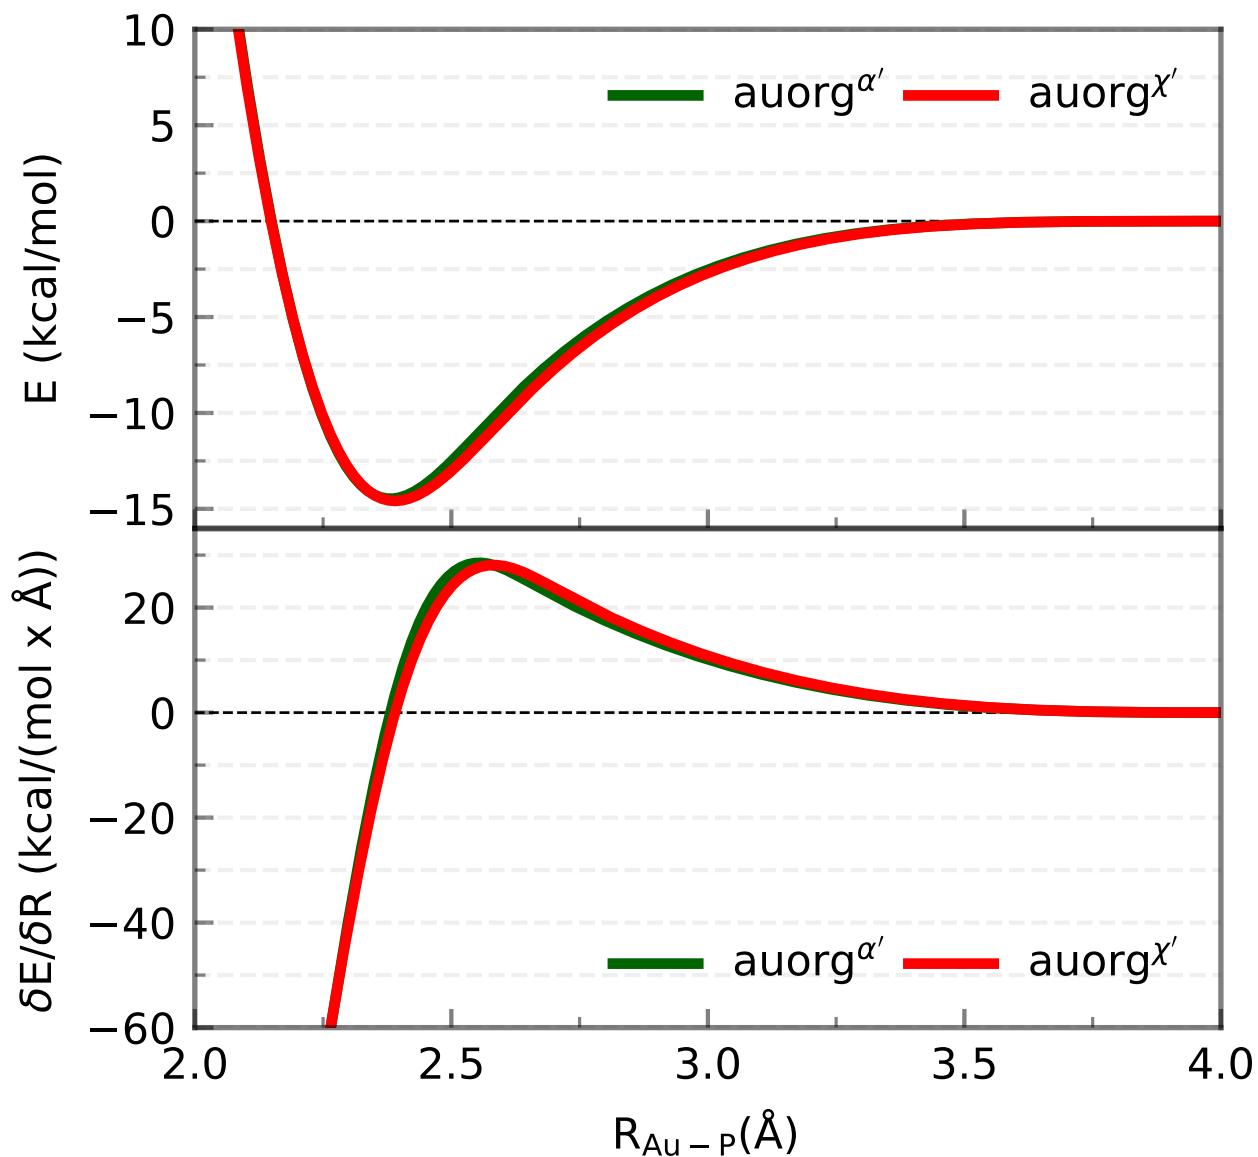

**Fig. S1** The DFTB2  $\text{auorg}^{\alpha'}$  and  $\text{auorg}^{\chi'}$  Au-P repulsive potentials. Ideally, the DFTB repulsive potentials are positive, however, in the case of Au-P potential the repulsive potential is negative in the bonding range of  $\approx 2.4 \text{\AA}$ . The attractive interaction was made to compensate the under-binding of Au-P electronic interaction, which can be attributed to the effect of the minimum basis set in the DFTB method. It is worth mentioning that the Au-Au repulsive potential is also attractive  $\approx 16 \text{ kcal/mol}$ .<sup>1</sup>

**Table S1** Test results for selected chemical reactions involving H, C, N, O, P, and S containing compounds for DFTB2/mio with various values of the P 3d orbital energy. The DFTB chemical reaction energies are compared to that of wB97X-D3BJ/def2-TZVP method.<sup>2</sup> The chemical reaction energies and deviations are in kcal/mol, P 3d orbital energies are in Hartree.

| Reactions                                       | $\Delta E^{react}$                                              | DFTB2 Deviations |                        |                        |                        |                        |                        |                        |                        |
|-------------------------------------------------|-----------------------------------------------------------------|------------------|------------------------|------------------------|------------------------|------------------------|------------------------|------------------------|------------------------|
|                                                 |                                                                 | wB97XD3BJ        | $\epsilon_p^{3d}=0.02$ | $\epsilon_p^{3d}=0.07$ | $\epsilon_p^{3d}=0.12$ | $\epsilon_p^{3d}=0.22$ | $\epsilon_p^{3d}=0.32$ | $\epsilon_p^{3d}=0.42$ | $\epsilon_p^{3d}=0.52$ |
| P <sub>2</sub>                                  |                                                                 | -77.34           | 23.36                  | 27.24                  | 29.78                  | 32.86                  | 34.63                  | 35.78                  | 36.58                  |
| + P <sub>2</sub>                                | = P <sub>4</sub>                                                | -47.03           | 39.31                  | 40.00                  | 40.34                  | 40.56                  | 40.55                  | 40.46                  | 40.35                  |
| + 2 H <sub>2</sub>                              | = H <sub>2</sub> PPH <sub>2</sub>                               | -40.35           | 4.71                   | 6.86                   | 8.34                   | 10.27                  | 11.48                  | 12.32                  | 12.93                  |
| + 2 H <sub>3</sub> CCH <sub>3</sub>             | = H <sub>6</sub> C <sub>2</sub> PPC <sub>2</sub> H <sub>6</sub> | -49.43           | 65.97                  | 64.82                  | 63.89                  | 62.46                  | 61.42                  | 60.63                  | 60.00                  |
| + 3 H <sub>2</sub>                              | = 2 PH <sub>3</sub>                                             | -12.93           | 10.04                  | 9.72                   | 9.48                   | 9.10                   | 8.84                   | 8.64                   | 8.48                   |
| + H <sub>2</sub>                                | = PH <sub>3</sub>                                               | -23.99           | 20.34                  | 19.55                  | 18.94                  | 18.02                  | 17.38                  | 16.90                  | 16.53                  |
| + 2 H <sub>2</sub>                              | = PH <sub>3</sub>                                               | -33.29           | 30.81                  | 29.42                  | 28.33                  | 26.74                  | 25.63                  | 24.82                  | 24.19                  |
| + 3 H <sub>2</sub>                              | = PH <sub>3</sub>                                               | -10.23           | 23.11                  | 21.42                  | 19.91                  | 17.30                  | 15.15                  | 13.37                  | 11.87                  |
| OP(CH <sub>3</sub> ) <sub>3</sub>               | = H <sub>3</sub> PO                                             | -43.45           | 12.20                  | 11.47                  | 10.92                  | 10.15                  | 9.63                   | 9.26                   | 8.98                   |
| HPCH <sub>2</sub>                               | = H <sub>2</sub> PCH <sub>3</sub>                               | -34.93           | 16.99                  | 16.37                  | 15.89                  | 15.20                  | 14.72                  | 14.37                  | 14.10                  |
| + H <sub>2</sub>                                | = HPCH <sub>2</sub>                                             | -19.42           | 10.01                  | 12.18                  | 13.69                  | 15.55                  | 16.58                  | 17.20                  | 17.59                  |
| + H <sub>2</sub>                                | = HPNH                                                          | -45.32           | 28.84                  | 25.86                  | 23.76                  | 20.96                  | 19.11                  | 17.79                  | 16.79                  |
| HPNH                                            | = H <sub>2</sub> PNH <sub>2</sub>                               | -10.13           | 15.91                  | 11.86                  | 8.61                   | 3.82                   | 0.60                   | -1.70                  | -3.41                  |
| + H <sub>2</sub>                                | = PH <sub>3</sub>                                               | -14.26           | 48.16                  | 35.37                  | 25.31                  | 10.56                  | 0.32                   | -7.09                  | -12.65                 |
| + 3 H <sub>2</sub>                              | = PH <sub>3</sub>                                               | -4.26            | 43.49                  | 30.27                  | 19.72                  | 4.16                   | -6.52                  | -14.16                 | -19.83                 |
| + 3 H <sub>2</sub>                              | = PH <sub>3</sub>                                               | -507.00          | -450.11                | -407.74                | -372.00                | -315.47                | -273.00                | -240.04                | -213.77                |
| P(NC <sub>2</sub> H <sub>6</sub> ) <sub>3</sub> | = P <sub>4</sub> O <sub>6</sub>                                 | -865.78          | -769.47                | -692.40                | -625.74                | -516.83                | -431.99                | -364.24                | -309.00                |
| + 3 O <sub>2</sub>                              | = P <sub>4</sub> O <sub>6</sub>                                 | 13.91            | 156.57                 | 138.93                 | 124.73                 | 103.30                 | 88.09                  | 76.75                  | 68.03                  |
| + 5 O <sub>2</sub>                              | = P <sub>4</sub> O <sub>6</sub>                                 | 43.97            | 151.91                 | 140.53                 | 130.46                 | 113.57                 | 100.08                 | 89.13                  | 80.12                  |
| P(OCH <sub>3</sub> ) <sub>3</sub>               | = H <sub>3</sub> PO                                             | 50.04            | 134.34                 | 123.72                 | 114.43                 | 98.99                  | 86.76                  | 76.91                  | 68.82                  |
| + 3 H <sub>2</sub>                              | = H <sub>3</sub> PO                                             | 31.14            | 101.01                 | 92.12                  | 84.47                  | 71.98                  | 62.26                  | 54.51                  | 48.22                  |
| + 3 H <sub>2</sub>                              | = H <sub>3</sub> PO                                             | -15.38           | -42.39                 | -40.38                 | -38.44                 | -34.90                 | -31.86                 | -29.28                 | -27.07                 |
| OP(OCH <sub>3</sub> ) <sub>3</sub>              | = H <sub>3</sub> PO <sub>4</sub>                                | -1.51            | 14.96                  | 12.98                  | 11.51                  | 9.49                   | 8.17                   | 7.25                   | 6.57                   |
| + 2 H <sub>2</sub> O                            | = PH <sub>3</sub>                                               | -0.25            | 15.19                  | 13.18                  | 11.71                  | 9.71                   | 8.43                   | 7.53                   | 6.87                   |
| + H <sub>2</sub>                                | = PH <sub>3</sub>                                               | 6.56             | 43.96                  | 34.01                  | 26.18                  | 14.75                  | 6.87                   | 1.16                   | -3.17                  |
| H <sub>2</sub> PSH                              | = PH <sub>3</sub>                                               |                  |                        |                        |                        |                        |                        |                        |                        |
| + H <sub>2</sub>                                | = PH <sub>3</sub>                                               |                  |                        |                        |                        |                        |                        |                        |                        |
| H <sub>2</sub> PSCH <sub>3</sub>                | = PH <sub>3</sub>                                               |                  |                        |                        |                        |                        |                        |                        |                        |
| + H <sub>2</sub>                                | = PH <sub>3</sub>                                               |                  |                        |                        |                        |                        |                        |                        |                        |
| H <sub>3</sub> PS <sub>4</sub>                  | = PH <sub>3</sub>                                               |                  |                        |                        |                        |                        |                        |                        |                        |

**Table S2** Averaged and normalized ligand binding energies in kcal/mol for small-sized clusters.

| Complexes                                                        | TPSS/def2-SVP | DFTB2/auorg <sup>α</sup> | DFTB2/auorg <sup>α'</sup> | DFTB2/auorg <sup>χ'</sup> |
|------------------------------------------------------------------|---------------|--------------------------|---------------------------|---------------------------|
| Au <sub>2</sub> (PH <sub>3</sub> ) <sub>2</sub>                  | -27.8         | -39.1                    | -48.1                     | -45.9                     |
| [Au <sub>3</sub> (PH <sub>3</sub> ) <sub>3</sub> ] <sup>+</sup>  | -47.8         | -60.9                    | -67.3                     | -65.4                     |
| Au <sub>4</sub> (PH <sub>3</sub> ) <sub>2</sub>                  | -33.9         | -40.3                    | -49.5                     | -47.6                     |
| Au <sub>2</sub> (PMe <sub>3</sub> ) <sub>2</sub>                 | -36.8         | -41.8                    | -49.9                     | -47.7                     |
| [Au <sub>3</sub> (PMe <sub>3</sub> ) <sub>3</sub> ] <sup>+</sup> | -64.5         | -66.8                    | -73.2                     | -71.4                     |
| Au <sub>4</sub> (PMe <sub>3</sub> ) <sub>2</sub>                 | -46.4         | -44.2                    | -52.6                     | -50.8                     |
| Au <sub>2</sub> (PPh <sub>3</sub> ) <sub>2</sub>                 | -37.9         | -41.8                    | -49.7                     | -47.6                     |
| [Au <sub>3</sub> (PPh <sub>3</sub> ) <sub>3</sub> ] <sup>+</sup> | -70.0         | -70.0                    | -77.0                     | -74.8                     |
| Au <sub>4</sub> (PPh <sub>3</sub> ) <sub>2</sub>                 | -48.7         | -45.0                    | -53.1                     | -51.4                     |

**Table S3** Averaged and normalized ligand binding energies in kcal/mol for moderate-sized clusters.

| Complexes                                                           | TPSS/def2-SVP | DFTB2/auorg <sup>α</sup> | DFTB2/auorg <sup>α'</sup> | DFTB2/auorg <sup>χ'</sup> |
|---------------------------------------------------------------------|---------------|--------------------------|---------------------------|---------------------------|
| [Au <sub>6</sub> (PH <sub>3</sub> ) <sub>6</sub> ] <sup>2+</sup>    | -52.1         | -63.1                    | -69.4                     | -67.6                     |
| [Au <sub>7</sub> (PH <sub>3</sub> ) <sub>7</sub> ] <sup>+</sup>     | -31.6         | -34.5                    | -43.4                     | -42.4                     |
| [Au <sub>8</sub> (PH <sub>3</sub> ) <sub>8</sub> ] <sup>2+</sup>    | -43.6         | -47.9                    | -55.4                     | -54.1                     |
| [Au <sub>9</sub> (PH <sub>3</sub> ) <sub>8</sub> ] <sup>3+</sup>    | -57.3         | -69.2                    | -75.3                     | -73.4                     |
| [Au <sub>11</sub> (PH <sub>3</sub> ) <sub>10</sub> ] <sup>3+</sup>  | -51.8         | -56.7                    | -63.5                     | -62.3                     |
| [Au <sub>13</sub> (PH <sub>3</sub> ) <sub>12</sub> ] <sup>5+</sup>  | -72.2         | -84.8                    | -90.3                     | -88.5                     |
| [Au <sub>20</sub> (PH <sub>3</sub> ) <sub>16</sub> ] <sup>4+</sup>  | -46.2         | -48.6                    | -56.0                     | -54.4                     |
| Au <sub>22</sub> (PH <sub>3</sub> ) <sub>12</sub>                   | -25.5         | -19.4                    | -30.0                     | -28.6                     |
| [Au <sub>6</sub> (PMe <sub>3</sub> ) <sub>6</sub> ] <sup>2+</sup>   | -71.1         | -70.7                    | -77.3                     | -75.4                     |
| [Au <sub>7</sub> (PMe <sub>3</sub> ) <sub>7</sub> ] <sup>+</sup>    | -46.5         | -39.4                    | -48.2                     | -46.9                     |
| [Au <sub>8</sub> (PMe <sub>3</sub> ) <sub>8</sub> ] <sup>2+</sup>   | -60.8         | -54.9                    | -62.4                     | -61.0                     |
| [Au <sub>9</sub> (PMe <sub>3</sub> ) <sub>8</sub> ] <sup>3+</sup>   | -79.0         | -78.5                    | -85.0                     | -83.1                     |
| [Au <sub>11</sub> (PMe <sub>3</sub> ) <sub>10</sub> ] <sup>3+</sup> | -71.2         | -65.2                    | -72.6                     | -71.0                     |
| [Au <sub>13</sub> (PMe <sub>3</sub> ) <sub>12</sub> ] <sup>5+</sup> | -98.2         | -97.8                    | -104.1                    | -102.3                    |
| [Au <sub>20</sub> (PMe <sub>3</sub> ) <sub>16</sub> ] <sup>4+</sup> | -65.9         | -57.2                    | -64.6                     | -62.9                     |
| Au <sub>22</sub> (PMe <sub>3</sub> ) <sub>12</sub>                  | -41.8         | -24.0                    | -34.1                     | -32.9                     |

**Table S4** Averaged and normalized ligand binding energies in kcal/mol for large-sized clusters, TPSS denotes TPSS/def2-SVP, α denotes DFTB2/auorg<sup>α</sup>, TPSS//α denotes TPSS/def2-SVP//DFTB2/auorg<sup>α</sup>, α' denotes DFTB2/auorg<sup>α'</sup>, TPSS//α' denotes TPSS/def2-SVP//DFTB2/auorg<sup>α'</sup>, χ' denotes DFTB2/auorg<sup>χ'</sup>, TPSS//χ' denotes TPSS/def2-SVP//DFTB2/auorg<sup>χ'</sup>.

| Complexes                                                                                | TPSS   | α      | TPSS//α | α'     | TPSS//α' | χ'     | TPSS//χ' |
|------------------------------------------------------------------------------------------|--------|--------|---------|--------|----------|--------|----------|
| [Au <sub>6</sub> (dppp) <sub>4</sub> ] <sup>2+</sup>                                     | -67.6  | -58.1  | -64.9   | -64.9  | -64.2    | -62.8  | -64.5    |
| [Au <sub>6</sub> (PPh <sub>3</sub> ) <sub>6</sub> ] <sup>2+</sup>                        | -87.2  | -82.2  | -86.2   | -89.4  | -85.9    | -87.4  | -85.8    |
| [Au <sub>7</sub> (PPh <sub>3</sub> ) <sub>7</sub> ] <sup>+</sup>                         | -63.9  | -49.9  | -64.6   | -58.6  | -64.7    | -57.6  | -63.8    |
| [Au <sub>8</sub> (PPh <sub>3</sub> ) <sub>7</sub> ] <sup>2+</sup>                        | -80.6  | -73.0  | -78.6   | -80.2  | -79.0    | -78.3  | -79.0    |
| [Au <sub>8</sub> (PPh <sub>3</sub> ) <sub>8</sub> ] <sup>2+</sup>                        | -79.6  | -69.7  | -79.3   | -77.3  | -79.3    | -75.8  | -78.8    |
| [Au <sub>8</sub> S <sub>2</sub> (dppm) <sub>4</sub> ] <sup>2+</sup>                      | -70.0  | -61.5  | -71.9   | -68.8  | -72.1    | -68.1  | -70.4    |
| [Au <sub>9</sub> (PPh <sub>3</sub> ) <sub>8</sub> ] <sup>3+</sup> (C <sub>4</sub> )      | -98.9  | -92.3  | -99.8   | -99.4  | -100.0   | -96.4  | -99.3    |
| [Au <sub>9</sub> (PPh <sub>3</sub> ) <sub>8</sub> ] <sup>3+</sup> (D <sub>2h</sub> )     | -99.3  | -94.2  | -99.4   | -101.4 | -99.8    | -99.4  | -99.5    |
| [Au <sub>11</sub> (PMePh <sub>2</sub> ) <sub>10</sub> ] <sup>3+</sup> (C <sub>3v</sub> ) | -85.8  | -76.4  | -87.7   | -83.8  | -87.6    | -82.6  | -87.0    |
| [Au <sub>11</sub> (PMePh <sub>2</sub> ) <sub>10</sub> ] <sup>3+</sup> (D <sub>4d</sub> ) | -85.6  | -76.5  | -87.0   | -84.0  | -87.1    | -84.9  | -86.6    |
| [Au <sub>13</sub> (dppm) <sub>6</sub> ] <sup>5+</sup>                                    | -108.6 | -104.9 | -109.0  | -111.7 | -109.2   | -109.8 | -108.6   |
| [Au <sub>20</sub> (PP <sub>3</sub> ) <sub>4</sub> ] <sup>4+</sup>                        | -78.4  | -57.2  | -69.4   | -62.6  | -70.2    | -60.8  | -69.5    |
| Au <sub>22</sub> (dppo) <sub>6</sub>                                                     | -49.5  | -30.1  | -51.5   | -39.1  | -50.7    | -39.0  | -49.5    |
| [Au <sub>38</sub> (m-MBT) <sub>20</sub> (PPh <sub>3</sub> ) <sub>4</sub> ] <sup>2+</sup> | -77.8  | -58.9  | -86.4   | -65.5  | -86.4    | -65.1  | -88.1    |
| Au <sub>70</sub> S <sub>20</sub> (PPh <sub>3</sub> ) <sub>12</sub>                       | -70.5  | -47.3  | -72.9   | -54.8  | -72.7    | -53.4  | -72.8    |

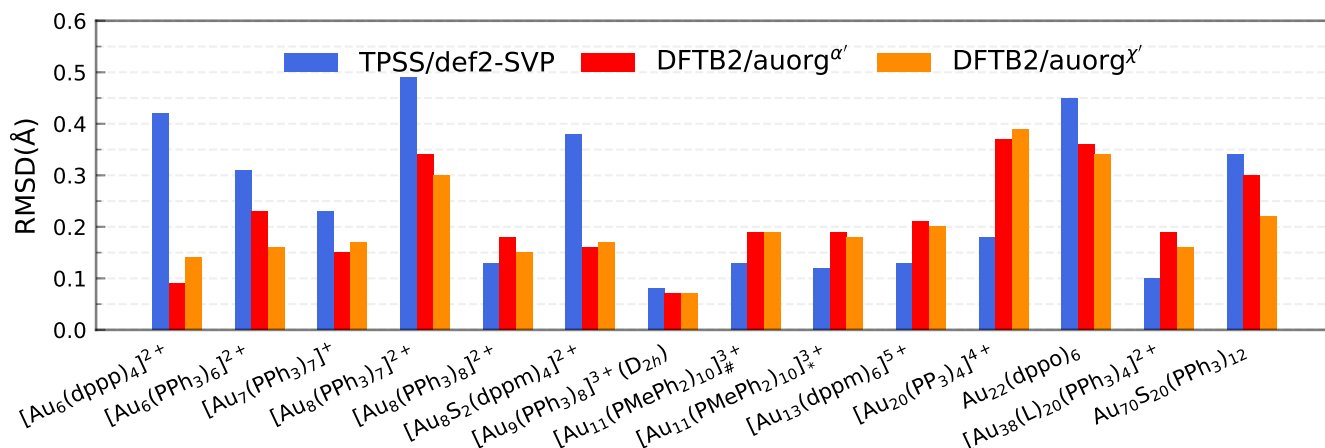

**Fig. S2** RMSD over atomic positions for the large-sized phosphine-stabilized gold clusters. The RMSD of atomic positions considers Au, and P atoms for all large-sized phosphine-based gold clusters, [Au<sub>11</sub>(PMePh<sub>2</sub>)<sub>10</sub>]<sub>#</sub><sup>3+</sup> denotes [Au<sub>11</sub>(PMePh<sub>2</sub>)<sub>10</sub>]<sup>3+</sup> (C<sub>3v</sub>), [Au<sub>11</sub>(PMePh<sub>2</sub>)<sub>10</sub>]<sub>\*</sub><sup>3+</sup> denotes [Au<sub>11</sub>(PMePh<sub>2</sub>)<sub>10</sub>]<sup>3+</sup> (D<sub>4d</sub>), [Au<sub>38</sub>(L)<sub>20</sub>(PPh<sub>3</sub>)<sub>4</sub>]<sup>2+</sup> denotes [Au<sub>38</sub>(m-MBT)<sub>20</sub>(PPh<sub>3</sub>)<sub>4</sub>]<sup>2+</sup>.

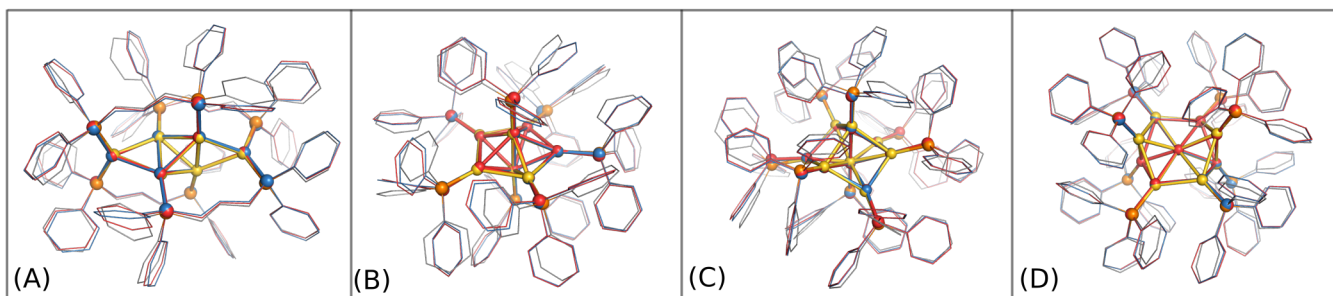

**Fig. S3** Overlap of experimental crystal structure (Au in gold, P in orange and C in grey) and optimized DFTB/auorg<sup>α</sup> and DFTB/auorg<sup>χ</sup> structures. auorg<sup>α</sup> and auorg<sup>χ</sup> structures are represented by light red and sky blue, respectively. The gold nanoclusters considered in this figure are (A) [Au<sub>6</sub>(dppp)<sub>4</sub>]<sup>2+</sup> (BOTSOS), (B) [Au<sub>7</sub>(PPh<sub>3</sub>)<sub>7</sub>]<sup>+</sup> (BIXZAK), (C) [Au<sub>8</sub>(PPh<sub>3</sub>)<sub>8</sub>]<sup>2+</sup> (OPAUPF), and (D) [Au<sub>9</sub>(PPh<sub>3</sub>)<sub>8</sub>]<sup>3+</sup> (MIVPOX-D<sub>2h</sub>).

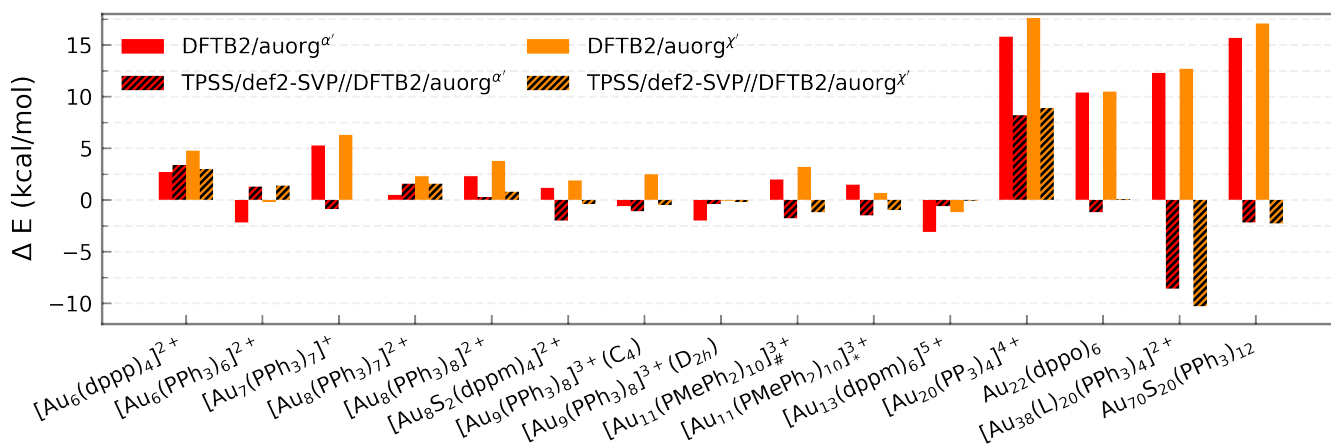

**Fig. S4** Deviation in averaged and normalized ligand binding energies for the large-sized phosphine-stabilized gold clusters in reference to the TPSS/def2-SVP binding energies, [Au<sub>11</sub>(PMePh<sub>2</sub>)<sub>10</sub>]<sub>#</sub><sup>3+</sup> denotes [Au<sub>11</sub>(PMePh<sub>2</sub>)<sub>10</sub>]<sup>3+</sup> (C<sub>3v</sub>), [Au<sub>11</sub>(PMePh<sub>2</sub>)<sub>10</sub>]<sub>\*</sub><sup>3+</sup> denotes [Au<sub>11</sub>(PMePh<sub>2</sub>)<sub>10</sub>]<sup>3+</sup> (D<sub>4d</sub>), [Au<sub>38</sub>(L)<sub>20</sub>(PPh<sub>3</sub>)<sub>4</sub>]<sup>2+</sup> denotes [Au<sub>38</sub>(m-MBT)<sub>20</sub>(PPh<sub>3</sub>)<sub>4</sub>]<sup>2+</sup>.

**Table S5** Comparison of relative energies with respect to the  $D_n$  isomers in kcal/mol as calculated by the following methods for  $[\text{Au}_9(\text{PPh}_3)_8]^{3+}$  and  $[\text{Au}_{11}(\text{PMePh}_2)_{10}]^{3+}$ .

| Methods                                     | $\text{Au}_9$ | $\text{Au}_{11}$ |
|---------------------------------------------|---------------|------------------|
| TPSS/def2-SVP                               | 4.98          | -3.20            |
| DFTB2/auorg <sup>all</sup>                  | 11.81         | 1.78             |
| DFTB2/auorg <sup>α</sup>                    | 11.76         | 1.38             |
| DFTB2/auorg <sup>χ'</sup>                   | 10.13         | 1.82             |
| TPSS/def2-SVP // DFTB2/auorg <sup>all</sup> | 6.29          | -5.90            |
| TPSS/def2-SVP // DFTB2/auorg <sup>α</sup>   | 5.19          | -7.63            |
| TPSS/def2-SVP // DFTB2/auorg <sup>χ'</sup>  | 6.31          | -5.92            |

### Isomerization energy of $[\text{Au}_9(\text{PPh}_3)_8]^{3+}$ and $[\text{Au}_{11}(\text{PMePh}_2)_{10}]^{3+}$ clusters

In practice, when studying chemical reactions, absolute cluster binding energies are not as important as relative binding energies, since a ligand is often replaced by another in the same reaction pathway. Therefore, to test the performance of DFTB for the prediction of isomerization energies, two particular examples, namely  $[\text{Au}_9(\text{PPh}_3)_8]^{3+}$  and  $[\text{Au}_{11}(\text{PMePh}_2)_{10}]^{3+}$  were investigated. In the solid phase,  $[\text{Au}_9(\text{PPh}_3)_8]^{3+}$  is reported to have a  $\text{Au}_9$  core with  $D_{2h}$  symmetry, as the full cluster takes a “butterfly” shape.<sup>3</sup> In a  $\text{CH}_2\text{Cl}_2$  or methanol solution, this cluster isomerizes to a  $C_4$  core with a crown-like structure.<sup>4</sup> The  $\text{Au}_{11}$  clusters have idealized  $C_{3v}$  and  $D_{4d}$  symmetric metal frameworks that differ around three adjacent peripheral sites.<sup>5</sup> The change in the skeletal geometries of  $\text{Au}_{11}$  clusters is proposed to be caused by the small variations in ligand packing and the presence of anionic ligands coordinated to the  $C_{3v}$   $\text{Au}_{11}$  gold core. It has been previously predicted that  $C_4$   $\text{Au}_9$  has a 5.7 kcal/mol lower energy than  $D_{2h}$   $\text{Au}_9$  in solution,<sup>4</sup> while so far no theoretical predictions were made yet for  $\text{Au}_{11}$  relative energy isomers. Here, we optimized the isomer structures of  $\text{Au}_9$  ( $D_{2h}$  and  $C_4$ ) and  $\text{Au}_{11}$  ( $C_{3v}$  and  $D_{4d}$ ) with both DFTB and TPSS methods. Their relative structural energies are compared in Figure S5.

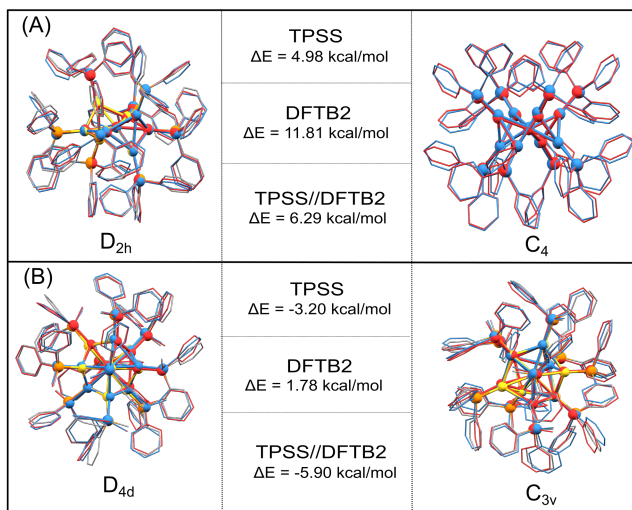

**Fig. S5** Overlap of experimental X-ray (Au in gold, P in orange and C in grey) and optimized structures of (A)  $[\text{Au}_9(\text{PPh}_3)_8]^{3+}$   $D_{2h}$  and  $C_4$  isomers and (B)  $[\text{Au}_{11}(\text{PMePh}_2)_{10}]^{3+}$   $D_{4d}$  and  $C_{3v}$  isomers. auorg<sup>all</sup> and DFT structures are represented by light red and sky blue, respectively. The relative energies in kcal/mol with respect to the  $D_n$  isomers are also shown as calculated by TPSS/def2-SVP, DFTB2/auorg<sup>all</sup> and TPSS/def2-SVP//DFTB2/auorg<sup>all</sup>. Note that the  $[\text{Au}_9(\text{PPh}_3)_8]^{3+}$   $C_4$  isomer does not have an available experimental crystal structure.

The relative energies of the isomers presented in Figure S5 were calculated with respect to the  $D_n$  isomers (on the left side) as the reference energy. For the  $[\text{Au}_9(\text{PPh}_3)_8]^{3+}$  cluster, all methods predict that the higher symmetry  $D_{2h}$  structure is more stable than the less symmetric  $C_4$  structure, with auorg<sup>all</sup> overstabilizing the high symmetry by about 5 kcal/mol. In the case of  $[\text{Au}_{11}(\text{PMePh}_2)_{10}]^{3+}$  isomers, the TPSS/def2-SVP calculated  $C_{3v}$  isomer is lower in energy than the  $D_{4d}$  isomer, while DFTB methods still predict a slightly more stable high symmetry structure. We note that both the isomer relative energies and their DFTB deviations are very small, around 5 kcal/mol, and that it is difficult to achieve perfect agreement even between different density functionals for this energy range. TPSS/def2-SVP single point energy calculations using the DFTB2/auorg<sup>all</sup> optimized structures reduce the differences between the relative energies to only 1.33 and 2.72 kcal/mol for  $\text{Au}_9$  and  $\text{Au}_{11}$  isomers, respectively, recovering the isomer energy ordering of the full TPSS

calculations. The complete comparison of the isomer relative energies as calculated by DFTB with all parameter sets is shown in Table S5 in the Supporting Information. The presented comparison demonstrates that, if one wishes to map the potential energy of a certain cluster with many isomers that are only a few kcal/mol apart in relative energies, performing geometry optimizations and pre-optimize structures with the DFTB method is a viable option to save computer time.

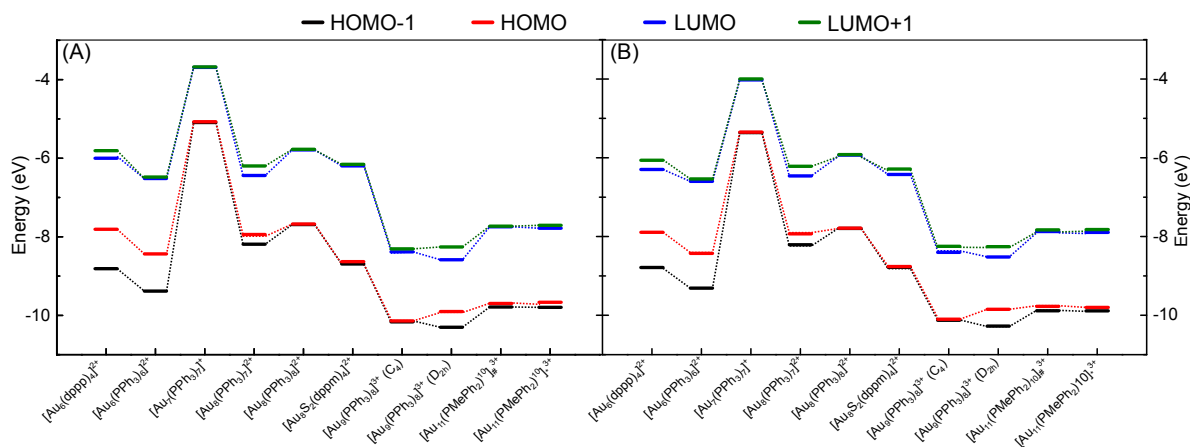

**Fig. S6** Energy level diagram for the frontier orbitals of various clusters as calculated by (A) DFTB/auorg<sup>α</sup> and (B) DFTB2/auorg<sup>α'</sup>, [Au<sub>11</sub>(PMePh<sub>2</sub>)<sub>10</sub>]<sub>#</sub><sup>3+</sup> denotes [Au<sub>11</sub>(PMePh<sub>2</sub>)<sub>10</sub>]<sup>3+</sup> (C<sub>3v</sub>), [Au<sub>11</sub>(PMePh<sub>2</sub>)<sub>10</sub>]<sub>\*</sub><sup>3+</sup> denotes [Au<sub>11</sub>(PMePh<sub>2</sub>)<sub>10</sub>]<sup>3+</sup> (D<sub>4d</sub>). Dashed lines are included to guide the eye.



**Table S6** Comparison of HOMO and LUMO in eV as calculated by DFTB/auorg<sup>6/7</sup>, DFTB/auorg<sup>6/7</sup>, and DFT for small gold clusters.

| Complexes                                                                                         | TPSS/def2-SVP   | DFTB2/auorg <sup>6/7</sup> | DFTB2/auorg <sup>6/7</sup> | DFTB2/auorg <sup>6/7</sup> |
|---------------------------------------------------------------------------------------------------|-----------------|----------------------------|----------------------------|----------------------------|
| [Au <sub>4</sub> (dppp) <sub>4</sub> ] <sup>2+</sup> (BOTSOS)                                     | -7.40 / -5.66   | -8.00 / -6.45              | -7.81 / -6.00              | -7.89 / -6.30              |
| [Au <sub>6</sub> (PPh <sub>3</sub> ) <sub>6</sub> ] <sup>2+</sup> (CATPAO10)                      | -8.15 / -6.22   | -8.51 / -6.82              | -8.44 / -6.52              | -8.43 / -6.60              |
| [Au <sub>7</sub> (PPh <sub>3</sub> ) <sub>7</sub> ] <sup>+</sup> (BIXZAK)                         | -5.10 / -3.47   | -5.38 / -4.10              | -5.07 / -3.69              | -5.35 / -4.02              |
| [Au <sub>8</sub> (PPh <sub>3</sub> ) <sub>7</sub> ] <sup>2+</sup> (BASWUN)                        | -7.70 / -5.99   | -8.01 / -6.68              | -7.94 / -6.44              | -7.93 / -6.47              |
| [Au <sub>8</sub> (PPh <sub>3</sub> ) <sub>8</sub> ] <sup>2+</sup> (OPAUFP)                        | -7.51 / -5.29   | -7.83 / -6.18              | -7.68 / -5.79              | -7.79 / -5.93              |
| [Au <sub>8</sub> S <sub>2</sub> (dppm) <sub>4</sub> ] <sup>2+</sup> (LEVKLU)                      | -7.97 / -5.67   | -8.86 / -6.52              | -8.63 / -6.20              | -8.76 / -6.42              |
| [Au <sub>9</sub> (PPh <sub>3</sub> ) <sub>8</sub> ] <sup>3+</sup> (MIVPOX-C4)                     | -9.84 / -7.94   | -10.17 / -8.58             | -10.14 / -8.38             | -10.10 / -8.40             |
| [Au <sub>9</sub> (PPh <sub>3</sub> ) <sub>8</sub> ] <sup>3+</sup> (MIVPOX-D <sub>2h</sub> )       | -9.63 / -8.01   | -9.92 / -8.74              | -9.91 / -8.59              | -9.85 / -8.52              |
| [Au <sub>11</sub> (PMePh <sub>2</sub> ) <sub>10</sub> ] <sup>3+</sup> (ZUCMAL)                    | -9.34 / -7.23   | -9.86 / -8.13              | -9.70 / -7.75              | -9.78 / -7.87              |
| [Au <sub>11</sub> (PMePh <sub>2</sub> ) <sub>10</sub> ] <sup>3+</sup> (ZUCMEP)                    | -9.43 / -7.23   | -9.83 / -8.15              | -9.67 / -7.78              | -9.80 / -7.90              |
| [Au <sub>13</sub> (dppm) <sub>6</sub> ] <sup>5+</sup> (LEVKAB)                                    | -13.34 / -12.28 | -13.73 / -12.48            | -13.77 / -12.39            | -13.69 / -12.40            |
| [Au <sub>20</sub> (PP <sub>3</sub> ) <sub>4</sub> ] <sup>4+</sup> (POFPUX)                        | -9.73 / -8.53   | -10.28 / -9.346            | -10.06 / -9.00             | -10.21 / -9.16             |
| Au <sub>22</sub> (dppo) <sub>6</sub> (TOCFIC)                                                     | -2.11 / -1.67   | -2.75 / -2.00              | -2.30 / -1.73              | -2.64 / -1.98              |
| [Au <sub>38</sub> (m-MBT) <sub>20</sub> (PPh <sub>3</sub> ) <sub>4</sub> ] <sup>2+</sup> (CEMZIG) | -7.19 / -6.07   | -7.55 / -6.50              | -7.52 / -6.50              | -7.52 / -6.40              |
| Au <sub>70</sub> S <sub>20</sub> (PPh <sub>3</sub> ) <sub>12</sub> (TELMUV)                       | -3.45 / -2.90   | -3.59 / -3.13              | -3.47 / -2.99              | -3.65 / -3.13              |

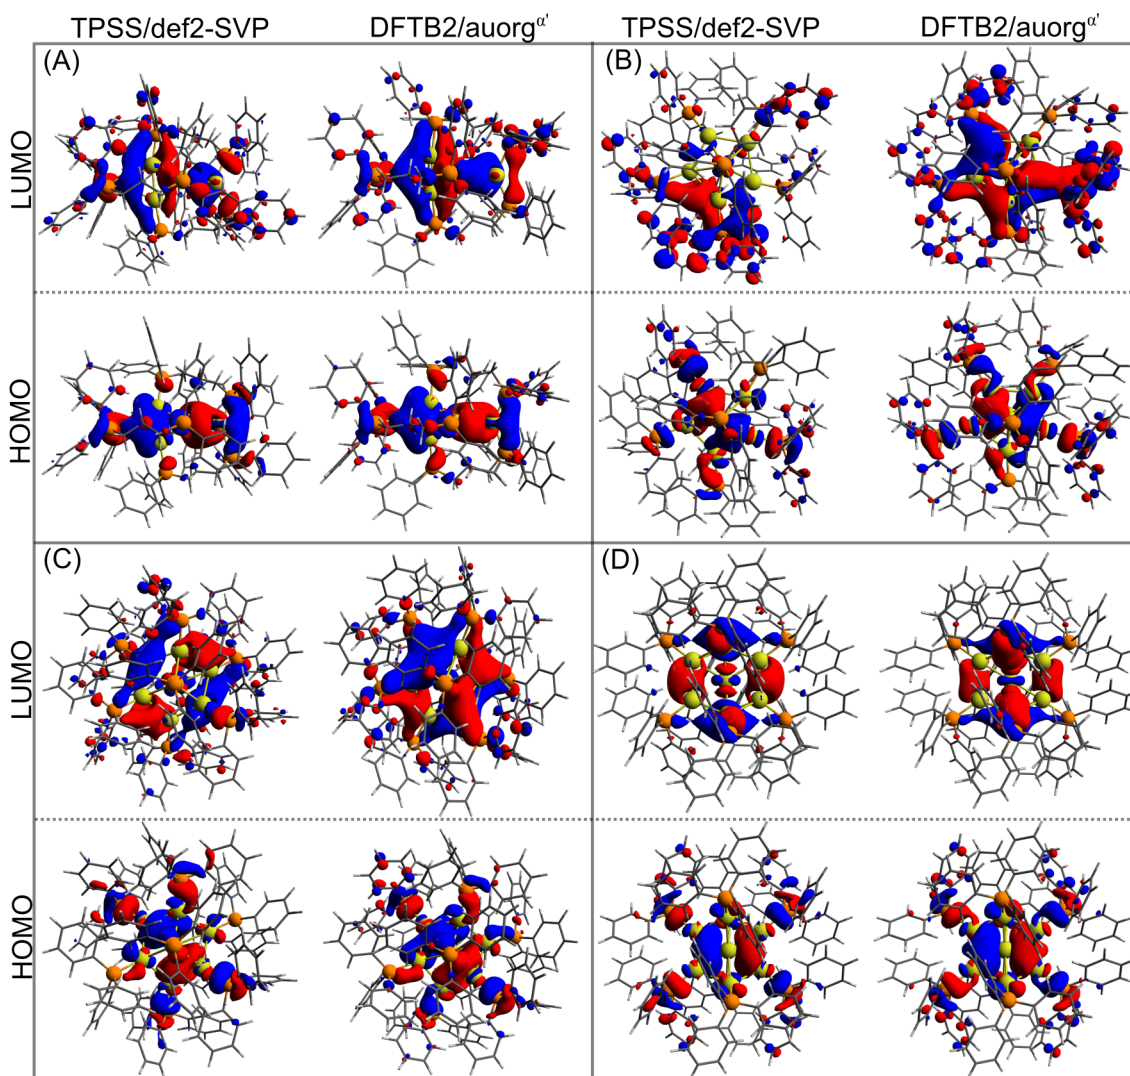

**Fig. S7** HOMO and LUMO of (A)  $[\text{Au}_6(\text{dppp})_4]^{2+}$ , (B)  $[\text{Au}_7(\text{PPh}_3)_7]^+$  (BIXZAK), (C)  $[\text{Au}_8(\text{PPh}_3)_8]^{2+}$  (OPAUPF) and (D)  $[\text{Au}_9(\text{PPh}_3)_8]^{3+}$  (MIVPOX- $D_{2h}$ ) clusters as calculated by TPSS/def2-SVP and DFTB2/auorg<sup>α'</sup>; isosurface value = 0.02 a.u.

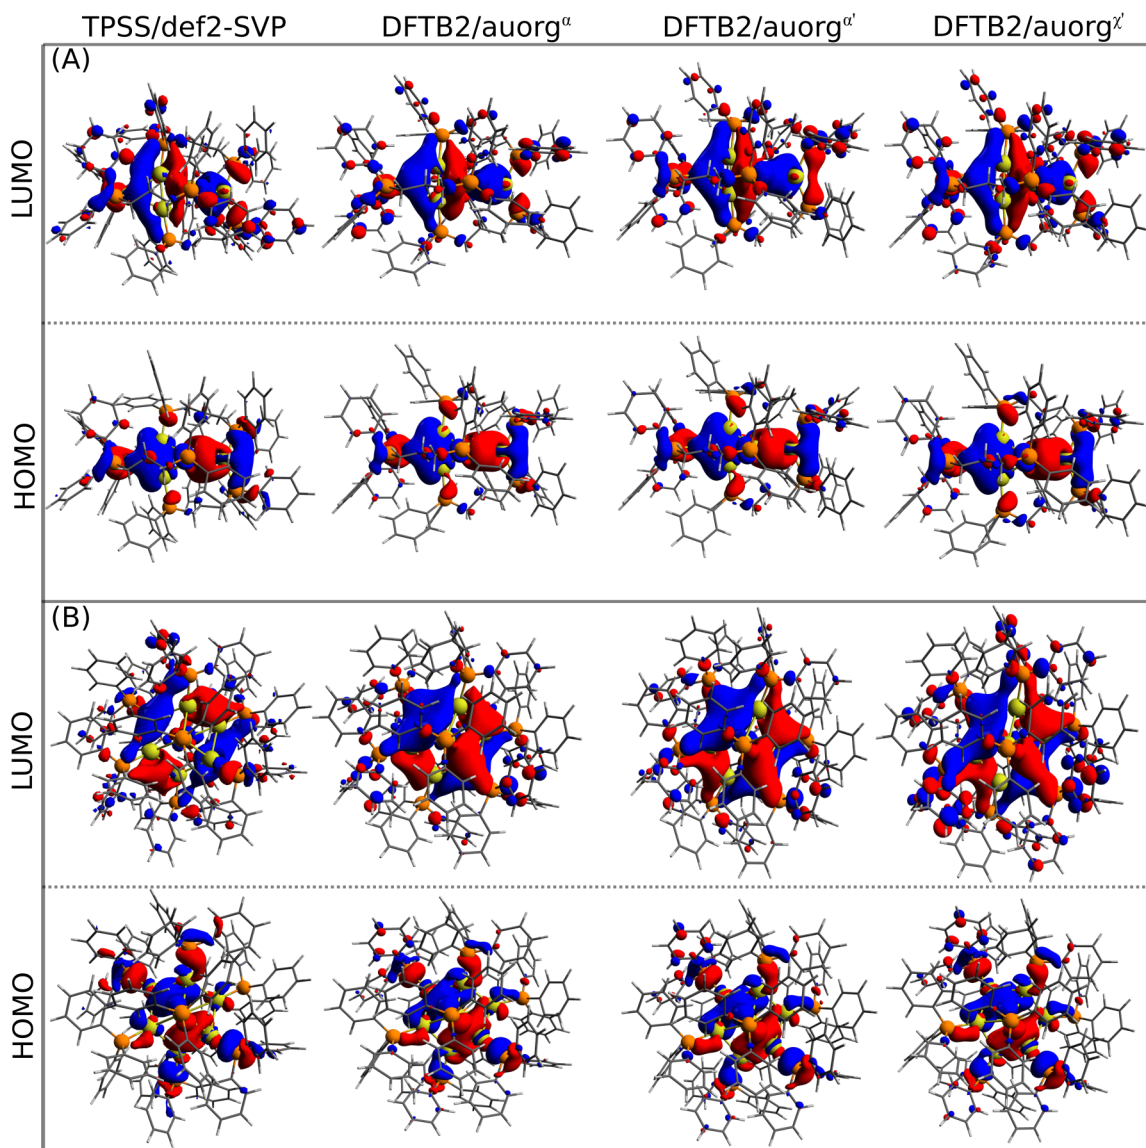

**Fig. S8** HOMO and LUMO of (A)  $[\text{Au}_6(\text{dpp})_4]^{2+}$  and (B)  $[\text{Au}_8(\text{PPh}_3)_8]^{2+}$  (OPAUPF) clusters as calculated by TPSS/def2-SVP, DFTB2/auorg<sup>α</sup>, DFTB2/auorg<sup>α'</sup>, and DFTB2/auorg<sup>α''</sup>; isosurface value = 0.02 a.u.

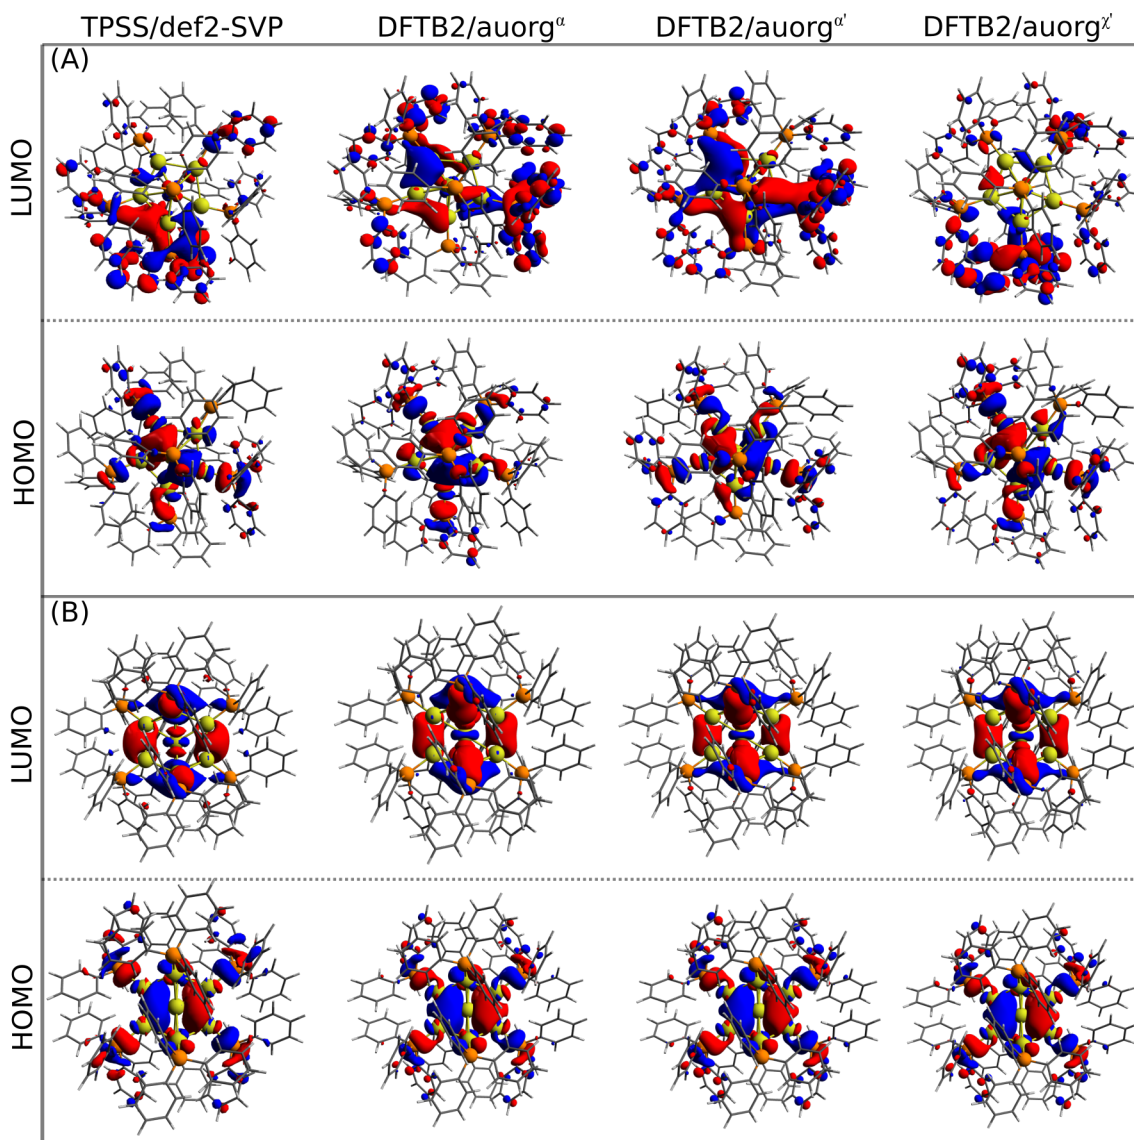

**Fig. S9** HOMO and LUMO of (A)  $[\text{Au}_7(\text{PPh}_3)_7]^+$  (BIXZAK) and (B)  $[\text{Au}_9(\text{PPh}_3)_8]^{3+}$  (MIVPOX- $D_{2h}$ ) clusters as calculated by TPSS/def2-SVP, DFTB2/auorg $^{\alpha'}$ , DFTB2/auorg $^{\alpha}$ , and DFTB2/auorg $^{\alpha'}$ ; isosurface value = 0.02 a.u.

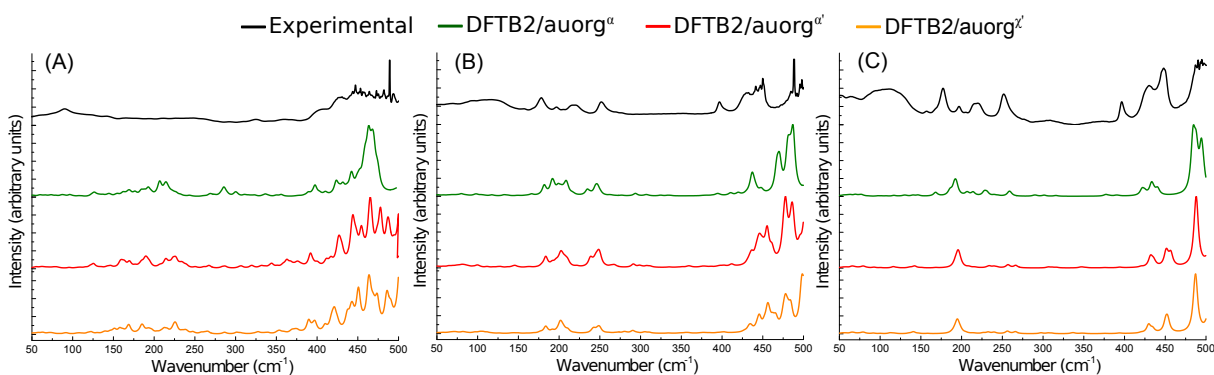

**Fig. S10** Experimental (in black), computed auorg $^{\alpha}$  (in green) DFTB2/auorg $^{\alpha'}$  (in red), and auorg $^{\alpha'}$  (in orange) far-IR spectra for (A)  $[\text{Au}_6(\text{dppp})_4]^{2+}$ , (B)  $[\text{Au}_8(\text{PPh}_3)_8]^{2+}$ , and (C)  $[\text{Au}_9(\text{PPh}_3)_8]^{3+}$  clusters.

**Table S7** Summary of contributing transitions as calculated by PBE/def2-SVP, DFTB2/auorg<sup>α</sup>, DFTB2/auorg<sup>α'</sup> and DFTB2/auorg<sup>α''</sup> for the [Au<sub>6</sub>(dppp)<sub>4</sub>]<sup>2+</sup> cluster and their assignment to the experimental spectral peaks, as well as a brief description of the assigned transition modes

| Experimental (cm <sup>-1</sup> ) | PBE/def2-SVP (cm <sup>-1</sup> ) | Intensity (km/mol) | DFTB2/auorg <sup>α'</sup> (cm <sup>-1</sup> ) | Intensity (km/mol) | DFTB2/auorg <sup>α</sup> (cm <sup>-1</sup> ) | Intensity (km/mol) | DFTB2/auorg <sup>α''</sup> (cm <sup>-1</sup> ) | Intensity (km/mol) | Mode description                                                    |
|----------------------------------|----------------------------------|--------------------|-----------------------------------------------|--------------------|----------------------------------------------|--------------------|------------------------------------------------|--------------------|---------------------------------------------------------------------|
| 90                               | 85.52                            | 2.6113             | 80.85                                         | 0.008              | 74.09                                        | 0.0142             | 70.44                                          | 0.0102             | Au core distortion                                                  |
|                                  | 87.06                            | 3.0854             |                                               |                    | 87.25                                        | 87.25              | 72.85                                          | 0.0119             |                                                                     |
|                                  | 89.74                            | 1.7775             |                                               |                    | 96.42                                        | 96.42              | 89.73                                          | 0.0102             |                                                                     |
|                                  | 119.65                           | 1.9408             | 115.45                                        | 0.0101             | 126.85                                       | 0.0326             | 137.82                                         | 0.0151             |                                                                     |
| 130                              | 125.79                           | 0.6063             | 121.47                                        | 0.0197             | 130.42                                       | 0.0114             | 140.15                                         | 0.0276             |                                                                     |
|                                  |                                  |                    | 125.57                                        | 0.053              | 136.98                                       | 0.0149             | 145.69                                         | 0.0247             |                                                                     |
|                                  |                                  |                    |                                               |                    | 145.9                                        | 0.0135             |                                                |                    |                                                                     |
| 325                              | 322.41                           | 1.0008             | 331.99                                        | 0.0207             | 323.49                                       | 0.0139             | 327.67                                         | 0.0297             | P <sub>2</sub> Ph <sub>4</sub> -(CH <sub>3</sub> ) <sub>3</sub> wag |
|                                  | 324.42                           | 1.5474             | 336.12                                        | 0.011              | 336.48                                       | 0.0245             |                                                |                    |                                                                     |
| 358                              | 343.09                           | 2.7216             | 344.08                                        | 0.0424             | 356.02                                       | 0.0225             | 339.77                                         | 0.0165             | P-(CH <sub>2</sub> ) <sub>3</sub> -P distortion                     |
|                                  | 343.54                           | 2.5989             | 351.05                                        | 0.015              |                                              |                    | 351.16                                         | 0.0218             |                                                                     |
|                                  | 346.55                           | 2.2757             | 358.08                                        | 0.0242             |                                              |                    | 353.92                                         | 0.0392             |                                                                     |
|                                  | 348.18                           | 2.8006             | 362.86                                        | 0.0826             |                                              |                    | 358.28                                         | 0.0142             |                                                                     |
|                                  |                                  |                    | 367.31                                        | 0.0253             |                                              |                    |                                                |                    |                                                                     |
|                                  |                                  |                    | 367.66                                        | 0.0208             |                                              |                    |                                                |                    |                                                                     |
| 410                              | 404.31                           | 4.7347             | 391.89                                        | 0.1727             | 397.37                                       | 0.0977             | 389.66                                         | 0.2028             | P-C-C-C-P bend                                                      |
|                                  | 404.79                           | 4.6453             | 395.32                                        | 0.0152             | 397.63                                       | 0.0307             | 394.54                                         | 0.0397             |                                                                     |
|                                  | 413.31                           | 0.8692             | 399.06                                        | 0.0149             | 402.98                                       | 0.0236             | 397.03                                         | 0.0523             |                                                                     |
|                                  | 414.48                           | 13.2331            | 400.7                                         | 0.0301             | 410.2                                        | 0.036              | 397.37                                         | 0.1089             |                                                                     |
|                                  | 416.7                            | 9.3675             | 411.36                                        | 0.0713             |                                              |                    | 409.68                                         | 0.0942             |                                                                     |
|                                  |                                  |                    | 417.66                                        | 4.9216             | 0.076                                        |                    |                                                |                    |                                                                     |
| 431                              | 425.22                           | 6.1159             | 424.99                                        | 0.0588             | 423.33                                       | 0.0516             | 417.41                                         | 0.1034             | Au-P stretch and P-Ph stretch                                       |
|                                  | 427.51                           | 5.486              | 426.34                                        | 0.1706             | 423.53                                       | 0.1058             | 419.09                                         | 0.1037             |                                                                     |
|                                  | 431.4                            | 3.7808             | 426.51                                        | 0.0396             | 427.4                                        | 0.0423             | 421.43                                         | 0.2731             |                                                                     |
|                                  | 434.64                           | 7.2679             | 428.16                                        | 0.1126             | 431.58                                       | 0.0984             | 424.72                                         | 0.1076             |                                                                     |
|                                  | 437.65                           | 0.9142             | 430.5                                         | 0.122              | 436.3                                        | 0.0258             |                                                |                    |                                                                     |
|                                  |                                  |                    |                                               |                    | 437.08                                       | 0.0141             |                                                |                    |                                                                     |
| 447                              | 441.92                           | 33.2022            | 441.98                                        | 0.0892             | 441.62                                       | 0.0948             | 436.94                                         | 0.0762             | P(CH <sub>2</sub> ) <sub>3</sub> Ph <sub>2</sub> distortion         |
|                                  | 442.69                           | 8.5664             | 443.44                                        | 0.0586             | 442.55                                       | 0.1481             | 437.2                                          | 0.164              |                                                                     |
|                                  |                                  |                    | 443.85                                        | 0.4207             |                                              |                    | 437.2                                          | 0.22               |                                                                     |
|                                  |                                  |                    | 447.01                                        | 0.1263             |                                              |                    | 441.82                                         | 0.1873             |                                                                     |
|                                  |                                  |                    |                                               |                    |                                              |                    | 443.69                                         | 0.0253             |                                                                     |
| 475                              |                                  |                    |                                               |                    |                                              |                    | 447.98                                         | 0.5041             |                                                                     |
|                                  |                                  |                    |                                               |                    |                                              |                    | 450.68                                         | 0.1313             |                                                                     |
|                                  |                                  |                    |                                               |                    |                                              |                    | 451.31                                         | 0.0172             |                                                                     |
|                                  |                                  |                    |                                               |                    |                                              |                    | 453.31-473.89                                  | Avg. 0.2414        |                                                                     |
|                                  | 457.58-485.52                    | Avg. 16.1239       | 448.67-477.85                                 | Avg. 0.2416        | 448.97-475.05                                | Avg. 0.1546        | 453.31-473.89                                  | Avg. 0.2414        |                                                                     |

**Table S8** Summary of contributing transitions as calculated by PBE/def2-SVP, DFTB2/auorg $\alpha'$ , DFTB2/auorg $\alpha$  and DFTB2/auorg $\alpha'$  for the  $[\text{Au}_8(\text{PPh}_3)_8]^{2+}$  cluster and their assignment to the experimental spectral peaks, as well as a brief description of the assigned transition modes

| Experimental (cm <sup>-1</sup> ) | PBE/def2-SVP (cm <sup>-1</sup> ) | Intensity (km/mol) | DFTB2/auorg $\alpha'$ (cm <sup>-1</sup> ) | Intensity (km/mol) | DFTB2/auorg $\alpha$ (cm <sup>-1</sup> ) | Intensity (km/mol) | DFTB2/auorg $\alpha'$ (cm <sup>-1</sup> ) | Intensity (km/mol) | Mode description            |        |
|----------------------------------|----------------------------------|--------------------|-------------------------------------------|--------------------|------------------------------------------|--------------------|-------------------------------------------|--------------------|-----------------------------|--------|
| 182                              | 173.46                           | 1.4183             | 146.17                                    | 0.0229             | 166.17                                   | 0.0347             | 176.69                                    | 0.0247             | Au core distortion          |        |
|                                  | 176.12                           | 11.457             |                                           | 0.0165             | 181.34                                   | 0.0913             | 183.25                                    | 0.0941             |                             |        |
|                                  | 176.23                           | 11.3283            |                                           | 0.0782             | 182                                      | 0.1359             | 183.88                                    | 0.089              |                             |        |
| 218                              | 185.35-223.02                    | Avg. 1.0292        | 178.65                                    | 0.0913             | 181.34                                   | 0.0913             | 183.25                                    | 0.0941             | Ph rock                     |        |
|                                  |                                  | 183.44             | 0.091                                     | 191.17             | 0.23                                     | 191.53             | 0.0338                                    | 191.8              |                             | 0.0251 |
|                                  |                                  | 191.34             | 0.028                                     | 192.78             | 0.0954                                   | 197.43             | 0.0213                                    | 197.43             |                             | 0.0213 |
|                                  |                                  | 191.9              | 0.0272                                    | 193.37             | 0.0533                                   | 200.69             | 0.0749                                    | 200.69             |                             | 0.0749 |
|                                  |                                  | 196.17             | 0.0607                                    | 198.77             | 0.0785                                   | 201.22             | 0.0879                                    | 201.22             |                             | 0.0879 |
|                                  |                                  | 199                | 0.0264                                    | 199.03             | 0.0718                                   | 201.79             | 0.0822                                    | 201.79             |                             | 0.0822 |
|                                  |                                  | 201.5              | 0.0867                                    | 202.03             | 0.0457                                   | 202.94             | 0.0779                                    | 202.94             |                             | 0.0779 |
|                                  |                                  | 202.39             | 0.0949                                    | 202.42             | 0.0446                                   | 204.76             | 0.0173                                    | 204.76             |                             | 0.0173 |
|                                  |                                  | 204.11             | 0.0638                                    | 205.02             | 0.035                                    | 205.26             | 0.0602                                    | 205.26             |                             | 0.0602 |
|                                  |                                  | 206.59             | 0.0143                                    | 206.4              | 0.0268                                   | 207.56             | 0.0173                                    | 207.56             |                             | 0.0173 |
|                                  |                                  | 206.82             | 0.0448                                    | 207.82             | 0.0365                                   | 210.66             | 0.0802                                    | 210.66             |                             | 0.0802 |
|                                  |                                  | 208.4              | 0.0366                                    | 208.45             | 0.0712                                   |                    |                                           |                    |                             |        |
|                                  |                                  | 208.4              | 0.0366                                    | 208.72             | 0.0708                                   |                    |                                           |                    |                             |        |
|                                  |                                  | 210.53             | 0.0729                                    | 209.04             | 0.0494                                   |                    |                                           |                    |                             |        |
|                                  |                                  | 210.53             | 0.0729                                    | 209.86             | 0.0415                                   |                    |                                           |                    |                             |        |
| 210.53                           | 0.0729                           | 210.49             | 0.0333                                    |                    |                                          |                    |                                           |                    |                             |        |
| 210.53                           | 0.0729                           | 216.17             | 0.0181                                    |                    |                                          |                    |                                           |                    |                             |        |
| 210.53                           | 0.0729                           | 217.81             | 0.0101                                    |                    |                                          |                    |                                           |                    |                             |        |
| 259                              | 247.43-265.45                    | Avg. 1.3214        | 221.81                                    | 0.0131             | 234.58                                   | 0.1216             | 240.69                                    | 0.0348             | Ph rock                     |        |
|                                  |                                  | 238.05             | 0.0642                                    | 238                | 0.0263                                   | 242.16             | 0.0414                                    | 242.16             |                             | 0.0414 |
|                                  |                                  | 238.66             | 0.0594                                    | 244                | 0.0378                                   | 242.47             | 0.0303                                    | 242.47             |                             | 0.0303 |
|                                  |                                  | 239.42             | 0.017                                     | 244.28             | 0.0176                                   | 243.07             | 0.0242                                    | 243.07             |                             | 0.0242 |
|                                  |                                  | 241.87             | 0.0138                                    | 244.87             | 0.069                                    | 246.36             | 0.0409                                    | 246.36             |                             | 0.0409 |
|                                  |                                  | 242.98             | 0.0168                                    | 245.58             | 0.0131                                   | 248.32             | 0.0459                                    | 248.32             |                             | 0.0459 |
|                                  |                                  | 245                | 0.061                                     | 246.01             | 0.0521                                   | 248.45             | 0.0297                                    | 248.45             |                             | 0.0297 |
|                                  |                                  | 245.74             | 0.0506                                    | 247.41             | 0.0436                                   | 249.57             | 0.0189                                    | 249.57             |                             | 0.0189 |
|                                  |                                  | 248.31             | 0.1025                                    | 247.45             | 0.0321                                   | 249.72             | 0.0118                                    | 249.72             |                             | 0.0118 |
|                                  |                                  | 248.74             | 0.0422                                    | 247.59             | 0.026                                    | 249.88             | 0.0692                                    | 249.88             |                             | 0.0692 |
|                                  |                                  | 248.92             | 0.028                                     | 247.83             | 0.0218                                   |                    |                                           |                    |                             |        |
|                                  |                                  | 250.29             | 0.0241                                    | 250.49             | 0.0373                                   |                    |                                           |                    |                             |        |
|                                  |                                  | 250.41             | 0.0641                                    | 256.04             | 0.0008                                   |                    |                                           |                    |                             |        |
|                                  |                                  | 250.41             | 0.0641                                    | 262.06             | 0.0116                                   |                    |                                           |                    |                             |        |
|                                  |                                  | 250.41             | 0.0641                                    |                    |                                          |                    |                                           |                    |                             |        |
| 398                              | 390.38-406.89                    | Avg. 0.1938        | 351.07-402.89                             | Avg. 0.0035        | 375.66-396.94                            | Avg. 0.0033        | 350.18-402.90                             | Avg. 0.0038        | Ph twist                    |        |
|                                  | 426.97-441.72                    | Avg. 2.6561        | 431.28-455.63                             | Avg. 0.0873        | 410.22-448.34                            | Avg. 0.0423        | 427.38-457.86                             | Avg. 0.0885        | PPh <sub>3</sub> distortion |        |
| 480                              | 498.85-507.62                    | Avg. 21.2375       | 460.98-487.34                             | Avg. 0.2324        | 466.34-487.27                            | Avg. 0.2316        | 462.09-484.41                             | Avg. 0.2373        |                             |        |

**Table S9** Summary of contributing transitions as calculated by PBE/def2-SVP, DFTB2/auorg $\alpha'$ , DFTB2/auorg $\alpha$  and DFTB2/auorg $\alpha'$  for the  $[\text{Au}_9(\text{PPh}_3)_8]^{3+}$  cluster and their assignment to the experimental spectral peaks, as well as a brief description of the assigned transition modes

| Experimental (cm <sup>-1</sup> ) | PBE/def2-SVP (cm <sup>-1</sup> )                                   | Intensity (km/mol)                                                 | DFTB2/auorg $\alpha'$ (cm <sup>-1</sup> ) | Intensity (km/mol) | DFTB2/auorg $\alpha$ (cm <sup>-1</sup> ) | Intensity (km/mol) | DFTB2/auorg $\alpha'$ (cm <sup>-1</sup> ) | Intensity (km/mol) | Mode description            |
|----------------------------------|--------------------------------------------------------------------|--------------------------------------------------------------------|-------------------------------------------|--------------------|------------------------------------------|--------------------|-------------------------------------------|--------------------|-----------------------------|
| 157                              | 148.81                                                             | 2.2532                                                             | 136.28                                    | 0.0161             | 129.37                                   | 0.0176             | 141.33                                    | 0.0351             |                             |
|                                  |                                                                    |                                                                    | 142.19                                    | 0.0637             | 131.6                                    | 0.0153             | 147.08                                    | 0.017              |                             |
|                                  |                                                                    |                                                                    | 142.82                                    | 0.021              | 139.97                                   | 0.0291             | 158.37                                    | 0.0141             |                             |
| 177                              | 163.28<br>169.95<br>174.7<br>186.07<br>195<br>198.75<br>204.53     | 2.6164<br>9.6724<br>17.3597<br>1.5613<br>2.025<br>4.7331<br>3.7443 | 150.77                                    | 0.0136             | 168.01                                   | 0.1323             | 188                                       | 0.0321             | Au core distortion          |
|                                  |                                                                    |                                                                    | 168.16                                    | 0.0136             | 190.87                                   | 0.0694             | 194.67                                    | 0.2618             |                             |
|                                  |                                                                    |                                                                    | 190.19                                    | 0.0189             | 191.15                                   | 0.1564             | 195.37                                    | 0.2421             |                             |
|                                  |                                                                    |                                                                    | 192.12                                    | 0.0159             | 191.84                                   | 0.1133             | 198.78                                    | 0.0721             |                             |
|                                  |                                                                    |                                                                    | 192.73                                    | 0.1244             | 193.45                                   | 0.1528             | 205.06                                    | 0.0328             |                             |
| 197                              | 204.53                                                             | 3.7443                                                             | 193.1                                     | 0.0149             | 193.51                                   | 0.1877             |                                           |                    |                             |
|                                  |                                                                    |                                                                    | 195.64                                    | 0.2757             |                                          |                    |                                           |                    |                             |
|                                  |                                                                    |                                                                    | 196.09                                    | 0.2851             |                                          |                    |                                           |                    |                             |
| 220*                             | 214.56<br>214.91<br>217.12<br>217.77<br>218.61<br>218.69<br>219.36 | 0.6717<br>0.6573<br>2.4079<br>0.1111<br>0.0122<br>1.4505<br>1.3855 | 208.95                                    | 0.0403             | 206.25                                   | 0.0615             | 213.7                                     | 0.0159             | Ph rock                     |
|                                  |                                                                    |                                                                    | 215.13                                    | 0.0134             | 207.4                                    | 0.0581             | 215.86                                    | 0.012              |                             |
|                                  |                                                                    |                                                                    | 217.12                                    | 0.015              | 214.06                                   | 0.1124             | 226.53                                    | 0.0412             |                             |
|                                  |                                                                    |                                                                    |                                           |                    | 214.39                                   | 0.0153             |                                           |                    |                             |
|                                  |                                                                    |                                                                    |                                           |                    |                                          |                    |                                           |                    |                             |
|                                  |                                                                    |                                                                    |                                           |                    |                                          |                    |                                           |                    |                             |
|                                  |                                                                    |                                                                    |                                           |                    |                                          |                    |                                           |                    |                             |
| 252                              | 238.93-251.52                                                      | Avg. 1.4416                                                        | 231.09                                    | 0.0153             | 227.83                                   | 0.1353             | 232.29                                    | 0.0227             | PPh <sub>3</sub> distortion |
|                                  |                                                                    |                                                                    | 233.76                                    | 0.0244             | 229.86                                   | 0.0213             | 232.47                                    | 0.0258             |                             |
|                                  |                                                                    |                                                                    | 233.97                                    | 0.0239             | 231.21                                   | 0.1022             | 232.84                                    | 0.0239             |                             |
|                                  |                                                                    |                                                                    | 234.03                                    | 0.0215             | 240.05                                   | 0.0349             | 239.67                                    | 0.0522             |                             |
|                                  |                                                                    |                                                                    | 239.78                                    | 0.0499             | 244.58                                   | 0.0159             | 241.13                                    | 0.0175             |                             |
|                                  |                                                                    |                                                                    | 243.36                                    | 0.029              | 258.28                                   | 0.1192             | 256.19                                    | 0.1159             |                             |
|                                  |                                                                    |                                                                    | 256.9                                     | 0.1193             | 259.19                                   | 0.0141             | 256.39                                    | 0.0101             |                             |
|                                  |                                                                    |                                                                    |                                           |                    | 259.32                                   | 0.0138             |                                           |                    |                             |
|                                  |                                                                    |                                                                    |                                           |                    | 260.15                                   | 0.0371             |                                           |                    |                             |
|                                  |                                                                    |                                                                    | 397                                       | 390.16-401.64      | Avg. 0.2980                              | 394.25             | 0.0091                                    | 389.87             |                             |
| 420.43                           | 0.0133                                                             | 420.46                                                             |                                           |                    |                                          | 0.0146             | 420.46                                    | 0.0146             |                             |
| 431.79                           | 0.401                                                              | 429.48                                                             |                                           |                    |                                          | 0.397              | 429.48                                    | 0.397              |                             |
| 432.69                           | 0.0108                                                             | 430.32                                                             |                                           |                    |                                          | 0.0537             | 430.32                                    | 0.0537             |                             |
| 430                              | 424.59-431.16                                                      | Avg. 2.4632                                                        | 432.7                                     | 0.0339             | 412.30-435.88                            | Avg. 0.074         | 433.86                                    | 0.03               | Ph twist                    |
|                                  |                                                                    |                                                                    | 434.9                                     | 0.0315             |                                          |                    | 434.53                                    | 0.1603             |                             |
|                                  |                                                                    |                                                                    | 435.54                                    | 0.1803             |                                          |                    | 435.16                                    | 0.0201             |                             |
|                                  |                                                                    |                                                                    | 435.91                                    | 0.0288             |                                          |                    |                                           |                    |                             |
|                                  |                                                                    |                                                                    | 437.89                                    | 0.0106             |                                          |                    |                                           |                    |                             |
| 448                              | 438.55-444.13                                                      | Avg. 5.2400                                                        | 451.01-456.88                             | Avg. 0.2211        | 440.57                                   | 0.2226             | 450.55-453.26                             | Avg. 0.2197        | PPh <sub>3</sub> distortion |
| 480                              | 489.33-492.65                                                      | Avg. 18.8798                                                       | 486.37-488.36                             | Avg. 0.5519        | 483.27-496.16                            | 0.5163             | 485.92-487.96                             | 0.562              |                             |

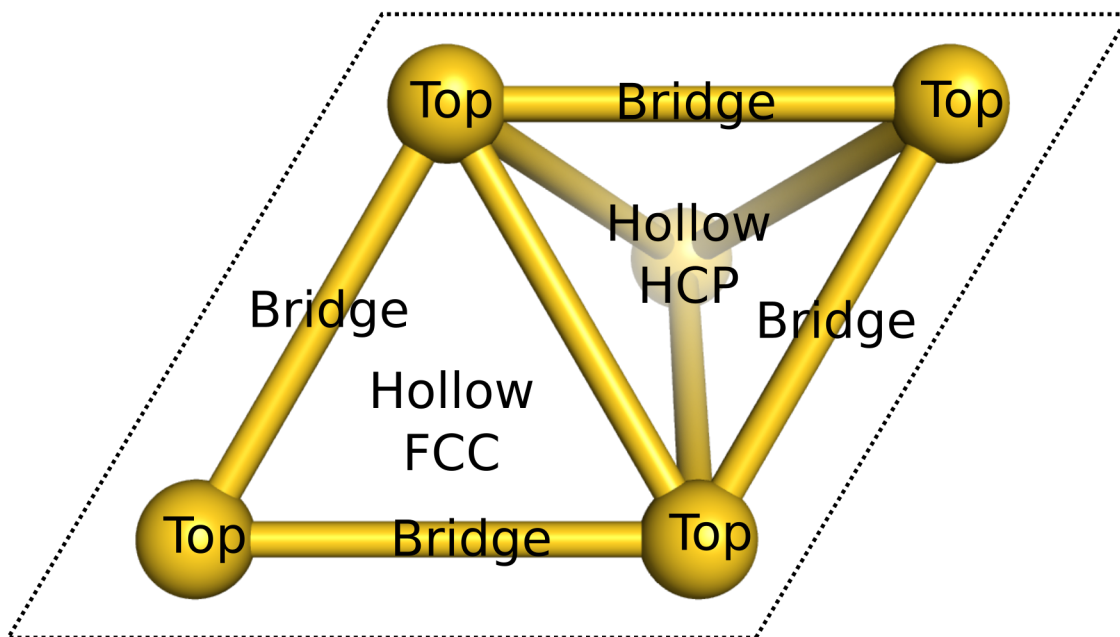

Fig. S11 Different adsorption binding sites on Au (111) surface, only the Au atoms of the top two layers are shown.

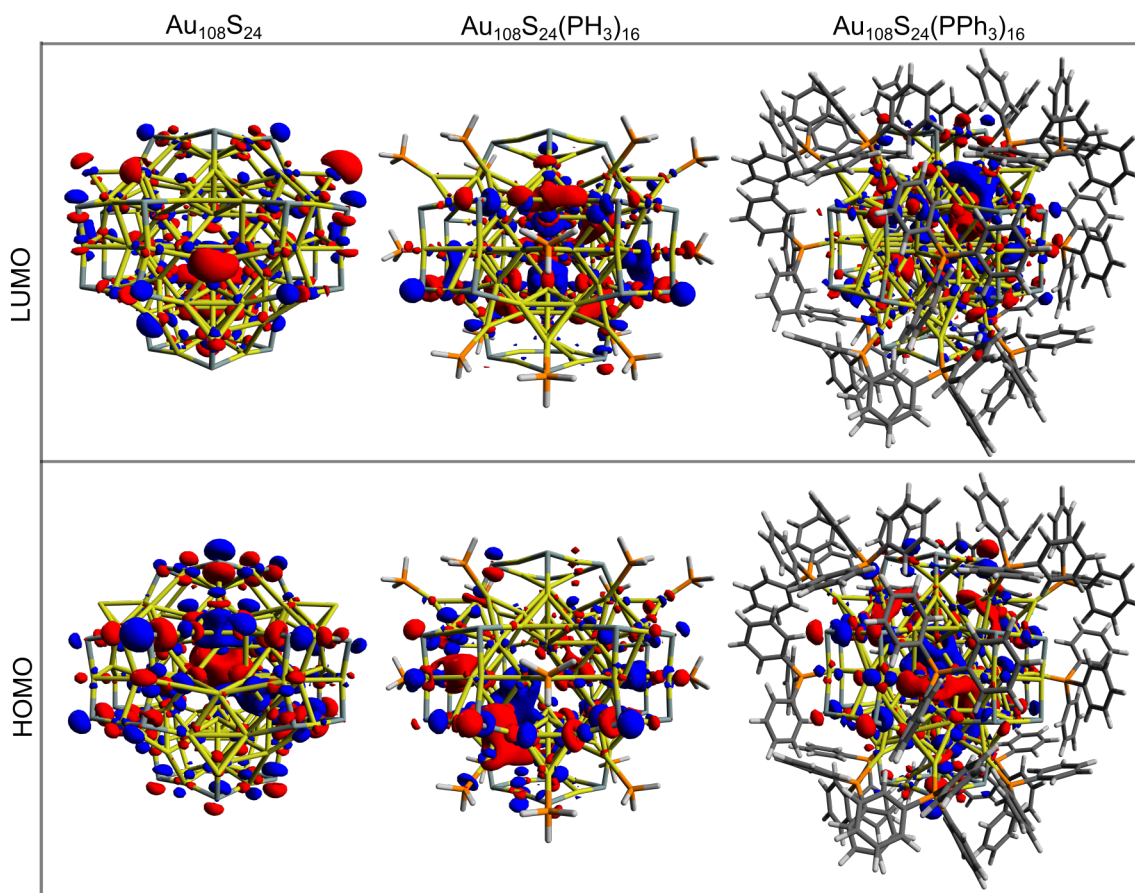

Fig. S12 HOMO and LUMO plots of  $\text{Au}_{108}\text{S}_{24}$ ,  $\text{Au}_{108}\text{S}_{24}(\text{PH}_3)_{16}$ , and  $\text{Au}_{108}\text{S}_{24}(\text{PPh}_3)_{16}$  clusters as calculated by TPSS/def2-SVP//DFTB2/auorg<sup>av</sup>; isosurface value =  $0.015 e^{0.5/a_0^3}$ .



**Table S10** Summary of contributing transitions determined by DFTB2/auorg<sup>at</sup> for the [Au<sub>108</sub>S<sub>24</sub>(PPh<sub>3</sub>)<sub>16</sub>] cluster and brief description of the assigned transition modes, part 1.

| DFTB2/auorg <sup>at</sup><br>(cm <sup>-1</sup> ) | Intensity<br>(km/mol) | Mode description                                                           |
|--------------------------------------------------|-----------------------|----------------------------------------------------------------------------|
| 26.387                                           | 0.01195               | Au core distortion                                                         |
| 54.087                                           | 0.01243               |                                                                            |
| 54.116                                           | 0.01255               |                                                                            |
| 56.459                                           | 0.01452               |                                                                            |
| 73.484                                           | 0.01721               |                                                                            |
| 76.592                                           | 0.0112                |                                                                            |
| 91.121                                           | 0.01114               | Au core distortion                                                         |
| 91.466                                           | 0.01238               |                                                                            |
| 93.606                                           | 0.01015               | asymmetric stretching Au-S-Au (planar rings) and PPh <sub>3</sub> twisting |
| 93.638                                           | 0.01133               |                                                                            |
| 102.984                                          | 0.01016               | Au core distortion                                                         |
| 103.05                                           | 0.0104                |                                                                            |
| 110.089                                          | 0.01135               |                                                                            |
| 113.072                                          | 0.01073               |                                                                            |
| 114.583                                          | 0.01228               |                                                                            |
| 118.282                                          | 0.02662               |                                                                            |
| 118.435                                          | 0.02339               |                                                                            |
| 118.772                                          | 0.01639               | Au-Au-Au rocking (connected to planar rings)                               |
| 119.34                                           | 0.01649               |                                                                            |
| 120.403                                          | 0.01194               | Au-Au-Au scissoring (connected to planar rings)                            |
| 120.684                                          | 0.01922               |                                                                            |
| 124.009                                          | 0.01762               | Au core distortion                                                         |
| 124.278                                          | 0.01728               |                                                                            |
| 124.451                                          | 0.01                  |                                                                            |
| 125.952                                          | 0.01163               |                                                                            |
| 133.768                                          | 0.01069               |                                                                            |
| 141.793                                          | 0.01276               |                                                                            |
| 164.734                                          | 0.01712               |                                                                            |
| 165.461                                          | 0.01824               |                                                                            |
| 165.477                                          | 0.01777               |                                                                            |
| 167.11                                           | 0.01346               |                                                                            |
| 167.291                                          | 0.01307               | Au-Au symmetric stretching (connected to PPh <sub>3</sub> )                |
| 180.925                                          | 0.02166               |                                                                            |
| 181.058                                          | 0.01548               | Au-P stretch                                                               |
| 182.297                                          | 0.02001               |                                                                            |
| 182.471                                          | 0.03368               |                                                                            |
| 182.914                                          | 0.02397               |                                                                            |
| 185.318                                          | 0.03596               |                                                                            |
| 185.487                                          | 0.02547               |                                                                            |
| 185.676                                          | 0.01155               |                                                                            |
| 185.741                                          | 0.01826               |                                                                            |
| 185.76-192.27                                    | Avg. 0.0346           |                                                                            |
| 198.523                                          | 0.14019               | symmetric stretching S-Au-S (planar rings)                                 |
| 200.25                                           | 0.10294               |                                                                            |
| 202.781                                          | 0.14811               |                                                                            |
| 204.909                                          | 0.04854               | Ph twist                                                                   |
| 204.915                                          | 0.0242                |                                                                            |
| 205.337                                          | 0.04331               |                                                                            |
| 207.877                                          | 0.08301               |                                                                            |
| 208.089                                          | 0.05917               |                                                                            |

**Table S11** Summary of contributing transitions determined by DFTB2/auorg<sup>av</sup> for the [Au<sub>108</sub>S<sub>24</sub>(PPh<sub>3</sub>)<sub>16</sub>] cluster and brief description of the assigned transition modes, part 2.

| DFTB2/auorg <sup>av</sup><br>(cm <sup>-1</sup> ) | Intensity<br>(km/mol) | Mode description                                  |
|--------------------------------------------------|-----------------------|---------------------------------------------------|
| 208.161                                          | 0.1301                | Ph rock                                           |
| 208.402                                          | 0.05661               |                                                   |
| 208.717                                          | 0.09316               |                                                   |
| 209.314                                          | 0.05062               |                                                   |
| 210.34                                           | 0.06436               |                                                   |
| 211.184                                          | 0.04972               |                                                   |
| 218.041                                          | 0.01951               | S-Au-S rocking (planar rings)                     |
| 218.41                                           | 0.01103               |                                                   |
| 218.467                                          | 0.02623               |                                                   |
| 218.943                                          | 0.11707               | Ph rocking                                        |
| 219.181                                          | 0.02061               |                                                   |
| 219.363                                          | 0.02627               |                                                   |
| 219.491                                          | 0.04727               |                                                   |
| 219.741                                          | 0.06469               |                                                   |
| 220.336                                          | 0.0208                | S-Au-S rocking (planar rings)                     |
| 222.196                                          | 0.04751               |                                                   |
| 222.776                                          | 0.03097               |                                                   |
| 222.996                                          | 0.00298               |                                                   |
| 223.114                                          | 0.04095               |                                                   |
| 223.41                                           | 0.03931               |                                                   |
| 226.198                                          | 0.11918               |                                                   |
| 234.336                                          | 0.00303               |                                                   |
| 234.5                                            | 0.00321               |                                                   |
| 237.519                                          | 0.02785               |                                                   |
| 237.597                                          | 0.00845               |                                                   |
| 237.735                                          | 0.01358               |                                                   |
| 237.761                                          | 0.02369               |                                                   |
| 238.013                                          | 0.01369               |                                                   |
| 238.173                                          | 0.05096               |                                                   |
| 238.236                                          | 0.05156               |                                                   |
| 238.412                                          | 0.02354               |                                                   |
| 238.818                                          | 0.01568               |                                                   |
| 238.993                                          | 0.02562               |                                                   |
| 239.258                                          | 0.07917               |                                                   |
| 241.089                                          | 0.69303               | Au-S stretch                                      |
| 241.192                                          | 0.64982               |                                                   |
| 241.595                                          | 0.25861               |                                                   |
| 241.738                                          | 0.01983               |                                                   |
| 242.066                                          | 0.10407               |                                                   |
| 242.172                                          | 0.02482               |                                                   |
| 243.156                                          | 0.05566               |                                                   |
| 243.74                                           | 0.05345               |                                                   |
| 243.962                                          | 0.01056               |                                                   |
| 247.977                                          | 0.06949               |                                                   |
| 248.71-252.17                                    | Avg. 0.0379           | Ph twist                                          |
| 255.09-262.74                                    | Avg. 0.1307           | PPh <sub>3</sub> distortion and Au-S stretch      |
| 265.03-272.86                                    | Avg. 0.0391           | Au <sub>4</sub> S <sub>4</sub> planar ring rock   |
| 274.386                                          | 0.05491               | Au <sub>4</sub> S <sub>4</sub> symmetric stretch  |
| 276.211                                          | 0.15656               |                                                   |
| 276.568                                          | 0.19116               |                                                   |
| 277.186                                          | 0.11359               | Au <sub>4</sub> S <sub>4</sub> asymmetric stretch |
| 279.671                                          | 0.03883               |                                                   |
| 279.781                                          | 0.08326               |                                                   |

**Table S12** Summary of contributing transitions determined by DFTB2/auorg<sup>av</sup> for the [Au<sub>108</sub>S<sub>24</sub>(PPh<sub>3</sub>)<sub>16</sub>] cluster and brief description of the assigned transition modes, part 3.

| DFTB2/auorg <sup>av</sup><br>(cm <sup>-1</sup> )               | Intensity<br>(km/mol)                                          | Mode description                                 |
|----------------------------------------------------------------|----------------------------------------------------------------|--------------------------------------------------|
| 280.284<br>285.686                                             | 0.0261<br>0.06474                                              | Au <sub>4</sub> S <sub>4</sub> twist             |
| 287.051<br>287.412                                             | 0.06944<br>0.40739                                             | Au <sub>4</sub> S <sub>4</sub> symmetric stretch |
| 291.177<br>291.437<br>292.643<br>294.434<br>297.485<br>302.74  | 0.03524<br>0.01303<br>0.02394<br>0.02065<br>0.01415<br>0.02364 | PPh <sub>3</sub> distortion                      |
| 334.01-372.66                                                  | Avg. 0.0205                                                    | Ph twist                                         |
| 431.06-459.86<br>471.809-495.78                                | Avg. 0.06291<br>Avg. 0.1485                                    | PPh <sub>3</sub> distortion                      |
| 506.28-520.33                                                  | Avg. 0.4313                                                    | PPh <sub>3</sub> distortion and Au-S stretch     |
| 521.401<br>522.278<br>522.656<br>525.037<br>525.403<br>525.648 | 0.12228<br>0.02622<br>0.00953<br>0.11265<br>0.24905<br>0.18726 | Au-S stretch                                     |
| 532.85-554.38                                                  | Avg. 1.6027                                                    | Ph twist and Au-S stretch                        |
| 559.916<br>570.926<br>571.017<br>571.603                       | 9.29723<br>7.77941<br>7.52268<br>1.64805                       | Au-P stretch and PPh <sub>3</sub> distortion     |
| 613.44-648.58                                                  | Avg. 0.1124                                                    | PPh <sub>3</sub> distortion                      |

### Validation of the DFTB Method in Predicting Infrared Spectra of Gold-Thiolates Clusters

To validate the reliability of the DFTB2 method in simulating IR spectra for gold-thiolates nanoclusters, we compare the DFTB predicted IR spectra to published DFT theoretical IR spectra for Au<sub>4</sub>(SCH<sub>3</sub>)<sub>4</sub>, Au<sub>18</sub>(SCH<sub>3</sub>)<sub>14</sub>, and [Au<sub>25</sub>(SCH<sub>3</sub>)<sub>18</sub>]<sup>-</sup> clusters.<sup>6-8</sup> In addition, we evaluate the capability of the DFTB2 method in describing ligand-ligand interactions and the effects of ligands on the structure and vibrational properties of the gold-thiolates clusters. We compare DFTB2 calculated IR to DFT calculated and experimental IR spectra for Au<sub>18</sub> core cluster with six different types of ligand; -SCH<sub>3</sub>, -S-c-C<sub>6</sub>H<sub>11</sub>, -SPh, -p-MBA, -SPhNO<sub>2</sub>, and -TBBT.<sup>8</sup> The effects of different ligands on the geometry of the Au<sub>18</sub> core are compared as well. Figure S13 shows that the DFTB calculated IR spectra are comparable to the corresponding DFT spectra predicted by Tlahuice-Flores in his previous work.<sup>8</sup> Similar to the IR spectra of the phosphine-stabilized [Au<sub>6</sub>(dppp)<sub>4</sub>]<sup>2+</sup>, [Au<sub>8</sub>(PPh<sub>3</sub>)<sub>8</sub>]<sup>2+</sup>, and [Au<sub>9</sub>(PPh<sub>3</sub>)<sub>8</sub>]<sup>3+</sup> clusters, the DFTB calculated intensities are significantly lower but the normalized spectral shapes agree with their DFT calculated counterparts.

Figure S14 shows DFTB calculated IR spectra of a Au<sub>18</sub> core cluster with six different types of ligands. Generally, DFTB calculated IR spectra resemble closely the DFT calculated spectra, but with smaller intensities than the reported ones by  $\approx$ 20-40 km/mol.<sup>8</sup> DFTB reproduces the change in IR spectra with the change of ligands well in comparison to the DFT calculated IR spectra. In particular, the case of Au<sub>18</sub>(-S-c-C<sub>6</sub>H<sub>11</sub>)<sub>14</sub> clearly shows that the DFTB IR spectrum agrees extremely well with the experimental spectrum (using the same methodology as for the phosphine-stabilized clusters).<sup>9</sup> Small deviations between DFTB and DFT IR spectra might be caused by different initial geometries for the previously published DFT- and our own DFTB-optimized geometries,<sup>8</sup> and because the geometry optimization of these large and complicated clusters can converge to different local minima. Among these Au<sub>18</sub> clusters, Au<sub>18</sub>(p-MBA)<sub>14</sub> and Au<sub>18</sub>(SPhNO<sub>2</sub>)<sub>14</sub> clusters have highest intensity in their IR signals particularly for the Au-Au and Au-S stretches in Au<sub>18</sub>S<sub>14</sub> core clusters when compared to the rest of the clusters. The increase in these IR intensities can be attributed to the large structural distortions caused by p-MBA and SPhNO<sub>2</sub> ligands. Figure S15 shows the distortions of the Au<sub>18</sub> core cluster caused by these ligands. This is consistent with the previous DFT-based study.<sup>8</sup> These results are very encouraging and suggests that the DFTB method is reliable in predicting the IR spectra for thiolate-protected gold clusters and confirms that it is able to describe the ligand-ligand interactions as well as ligands effects on gold clusters congruent with DFT

predictions.

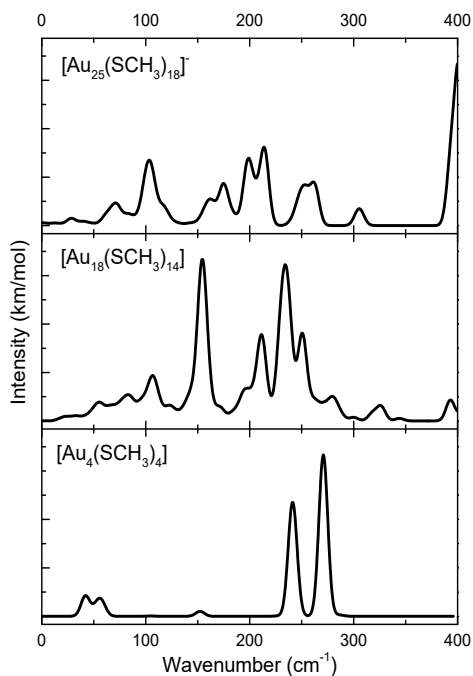

**Fig. S13** DFTB calculated IR spectra of Au<sub>4</sub>(SCH<sub>3</sub>)<sub>4</sub>, Au<sub>18</sub>(SCH<sub>3</sub>)<sub>14</sub>, and [Au<sub>25</sub>(SCH<sub>3</sub>)<sub>18</sub>]<sup>-</sup>.

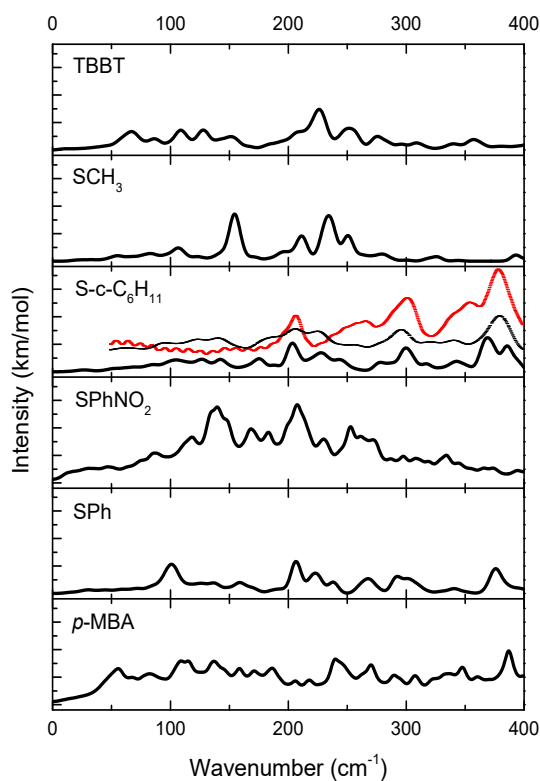

**Fig. S14** Calculated IR spectra of Au<sub>18</sub>(SCH<sub>3</sub>)<sub>14</sub>, Au<sub>18</sub>(S-c-C<sub>6</sub>H<sub>11</sub>)<sub>14</sub>, Au<sub>18</sub>(SPh)<sub>14</sub>, Au<sub>18</sub>(p-MBA)<sub>14</sub>, Au<sub>18</sub>(SPhNO<sub>2</sub>)<sub>14</sub>, and Au<sub>18</sub>(TBBT)<sub>14</sub> clusters using a FWHM of 5 cm<sup>-1</sup> Gaussian broadening. More intense IR spectra are observed on p-MBA- and SPhNO<sub>2</sub>-protected clusters. The additional plots in S-c-C<sub>6</sub>H<sub>11</sub>-ligated Au<sub>18</sub> are the experimental far-IR spectrum (dotted red) and the DFTB-simulated with a wider FWHM of 8 cm<sup>-1</sup> Gaussian broadening.

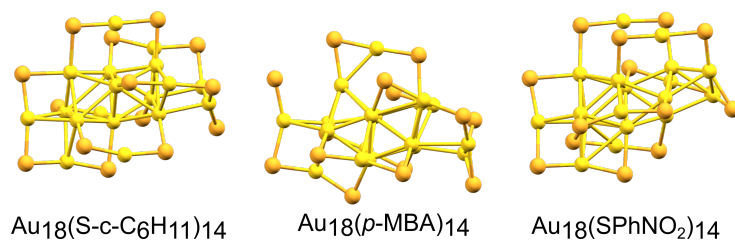

**Fig. S15**  $\text{Au}_{18}\text{S}_{14}$  core structures of  $\text{Au}_{18}(\text{S-c-C}_6\text{H}_{11})_{14}$ ,  $\text{Au}_{18}(\text{p-MBA})_{14}$ , and  $\text{Au}_{18}(\text{SPhNO}_2)_{14}$  clusters with four different ligands (ligand structures are omitted for clarity). Au and S atoms are yellow and orange. The clusters are optimized by means of DFTB/auorg<sup>av</sup> with the D3 dispersion corrections.

## Notes and references

- 1 A. Fihey, C. Hettich, J. Touzeau, F. Maurel, A. Perrier, C. Köhler, B. Aradi and T. Frauenheim, *J. Comput. Chem.*, 2015, **36**, 2075–2087.
- 2 Y.-S. Lin, G.-D. Li, S.-P. Mao and J.-D. Chai, *J. Chem. Theory Comput.*, 2013, **9**, 263–272.
- 3 F. Wen, U. Englert, B. Gutrath and U. Simon, *Eur. J. Inorg. Chem.*, 2008, **2008**, 106–111.
- 4 S. Yamazoe, S. Matsuo, S. Muramatsu, S. Takano, K. Nitta and T. Tsukuda, *Inorg. Chem.*, 2017, **56**, 8319–8325.
- 5 R. C. B. Copley and D. M. P. Mingos, *J. Chem. Soc., Dalt. Trans.*, 1996, 479–489.
- 6 A. Tlahuice-Flores, *Mol. Simul.*, 2013, **39**, 428–431.
- 7 A. Tlahuice-Flores, R. L. Whetten and M. Jose-Yacamán, *J. Phys. Chem. C*, 2013, **117**, 12191–12198.
- 8 A. Tlahuice-Flores, *Prog. Nat. Sci. Mater. Int.*, 2016, **26**, 510–515.
- 9 J. F. Alvino, T. Bennett, D. Anderson, B. Donoeva, D. Ovoshchnikov, R. H. Adnan, D. Appadoo, V. Golovko, G. Andersson and G. F. Metha, *RSC Adv.*, 2013, **3**, 22140–22149.
